1       **The First Complete Zoroastrian-Parsi Mitochondrial Reference Genome and genetic**  
2                                           **signatures of an endogamous non-smoking population**

3  
4       **Author Names and Affiliations:**

5       Viloo Morawala Patell\*<sup>1,2,3</sup>, Naseer Pasha<sup>1&2</sup>, Kashyap Krishnasamy<sup>1&2</sup>, Bharti Mittal<sup>1&2</sup>,  
6       Chellappa Gopalakrishnan<sup>1&2</sup>, Raja Mugasimangalam<sup>2&4</sup>, Naveen Sharma<sup>1&2</sup>, Arati-Khanna  
7       Gupta<sup>1</sup>, Perviz Bhote-Patell<sup>1</sup>, Sudha Rao<sup>2&4</sup>, Renuka Jain<sup>1&2</sup>, The Avestagenome Project<sup>®</sup>

8  
9                                           <sup>1</sup>*Avesthagen Limited, Bangalore, India*

10                                           <sup>2</sup>*The Avestagenome Project<sup>®</sup> International Pvt Ltd, Bangalore, Karnataka, India-*  
11                                           <sup>560005</sup>

12                                           <sup>3</sup>*AGENOME LLC, USA*

13                                           <sup>4</sup>*Genotypic Technologies Private Limited, Bangalore 560094*

14  
15       \*Corresponding Author:

16       Address correspondence to

17       Dr.Viloo Morawala Patell,

18       Avesthagen Limited

19       THE dry lab, Yolee Grande, 2nd Floor,

20       14, Pottery Road, Richard's Town,

21       Bangalore, 560005, Karnataka, India,

22       Email: [viloo@avesthagen.com](mailto:viloo@avesthagen.com);

23

24 **Abstract:**

25 The present-day Zoroastrian-Parsis have roots in ancient pastoralist migrations from circumpolar  
26 regions leading to their settlement on the Eurasian Steppes and later, as Indo-Iranians in the Fertile  
27 Crescent. After migrating from the Persian province of Pars to India, the Zoroastrians from Pars (  
28 “Parsis”) practiced endogamy, thereby preserving their genetic identity and social practices. The  
29 study was undertaken to gain an insight into the genetic consequences of migration on the  
30 community, the practice of endogamy, to decipher the phylogenetic relationships with other  
31 groups, and elucidate the disease linkages to their individual haplotypes

32 We generated the *de novo* the Zoroastrian-Parsi Mitochondrial Reference Genome (AGENOME-  
33 ZPMS-HV2a-1), which is the first complete mitochondrial reference genome assembled for this  
34 group. Phylogenetic analysis of an additional 99 Parsi mitochondrial genome sequences showed  
35 the presence of HV, U, T, A and F (belonging to the macrohaplogroup N) and Z and other M  
36 descendents of the macrohaplogroup M (M5, M39, M33, M44’52, M24, M3, M30, M2, M4’30,  
37 M2, M35 and M27) and a largely Persian origin for the Parsi community. We assembled individual  
38 reference genomes for each major haplogroup and the Zoroastrian-Parsi Mitochondrial Consensus  
39 Genome (AGENOME-ZPMCG V1.0), which is the first consensus genome assembled for this  
40 group. We report the existence of 420 mitochondrial genetic variants, including 12 unique variants,  
41 in the 100 Zoroastrian-Parsi mitochondrial genome sequences. Disease association mapping  
42 showed 217 unique variants linked to longevity and 41 longevity-associated disease phenotypes  
43 across the majority of haplogroups.

44 Analysis of the coding genes, tRNA genes, and the D-loop region revealed haplogroup-specific  
45 disease associations for Parkinson’s disease, Alzheimer’s disease, cancers, and rare diseases. No  
46 known mutations linked to lung cancer were found in our study. Mutational signatures linked to  
47 tobacco carcinogens, specifically, the C>A and G>T transitions, were observed at extremely low  
48 frequencies in the Parsi cohort, suggestive of an association between the cultural norm prohibiting  
49 smoking and its reflection in the genetic signatures. In sum, the Parsi mitochondrial genome  
50 provides an exceptional resource for determining details of their migration and uncovering novel  
51 genetic signatures for wellness and disease.

52 **Keywords:** Mitochondria, Zoroastrian-Parsi, endogamous, non-smoking, longevity

53  
54  
55  
56  
57  
58  
59  
60

## 61 Introduction

62

### 63 *The Travelogue of the Zoroastrian-Parsi Mitochondrion*

64 Human mitochondrial DNA (mtDNA) is a double-stranded, circular (16,569 kb) genome of  
65 bacterial origin<sup>1,2</sup>, primarily encoding 22 tRNAs and 2 rRNAs and the genes encoding subunits of  
66 the energy-generating oxidative phosphorylation and electron transport chain (ETC) pathway<sup>3,4</sup>.  
67 Analysis of the variability of mtDNA is commonly used to reconstruct the history of populations,  
68 especially with respect to maternal inheritance.

69 The accumulation over time of maternally inherited mitochondrial variants creates haplotypes<sup>4</sup>  
70 characteristic of different mtDNA lineages and can be used to follow populations through history  
71 and trace their migrations. Such an approach has also provided insights into the origins and disease  
72 etiologies associated with endogamous communities, such as the Icelandic population<sup>5</sup>, island  
73 communities of Andaman and Nicobar<sup>6</sup> and Polynesia<sup>7</sup>.

74

75 Until the fall of the Zoroastrian Persian Empire in the seventh century AD, the Zoroastrian-Parsis  
76 resided in what is now the province of Pars in present-day Iran<sup>8,9</sup>. To escape the persecution that  
77 ensued, the Zoroastrians from Pars<sup>10,11</sup> (referred to here as the “Parsis”) migrated to India in the 8<sup>th</sup>  
78 century AD. Because they practiced endogamy<sup>12,13</sup> among their Indian neighbors, Parsi genetic  
79 identity was retained to a large extent as well as certain social practices. As fire was considered  
80 sacred in the Zoroastrian religion<sup>14,15</sup>, strict social ostracism has long been maintained against  
81 smokers within the Parsi community. Today, the Parsis, are a small community of <52,000 in India  
82 (2011 Census, Govt of India). We present the genetic data for the conserved Parsi mitochondrion,  
83 which has survived largely intact for over 1300 years.

84

85 In this study, our aim was two fold: 1) to determine the consequences for the Parsi mitochondrial  
86 genome of the historic Parsi migration from Persia to India and their subsequent practice of  
87 endogamy and 2) to discover any linkages between the mtDNA variants observed in the Parsis  
88 and their predispositions to various diseases. To address these questions, we generated *de novo* the  
89 Zoroastrian Parsi Mitochondrial Genome (AGENOME-ZPMS-HV2a-1; Genbank ID,  
90 MT506314), which is complete and the first of its kind, and used it as our starting point to  
91 determine the mitochondrial haplogroup-specific reference genomes for 100 Parsi individuals. We  
92 also assembled the Zoroastrian Parsi Mitochondrial Consensus Genome (AGENOME-ZPMCG  
93 V1.0; Genbank ID MT506339), which is also the first of its kind.

94

95 Our phylogenetic analysis confirmed that the present-day Parsis are closely related to Persians and,  
96 like most endogamous communities, have comparatively low genetic diversity and are predisposed  
97 to several inherited genetic disorders<sup>16,17</sup>. Interestingly, the Parsis also possess longevity as a trait  
98 and are a long-lived community<sup>18</sup>, with lower incidences of lung cancer<sup>19</sup>. Overall, the Parsi

99 community is a unique genetic resource for understanding the linkage between mtDNA variation  
100 and disease.

101

## 102 **Results**

103

### 104 **Assembly of the first complete Zoroastrian-Parsi mitochondrial sequence, AGENOME- 105 ZPMS-HV2a-1**

106

107 The first complete *de novo* non-smoking Zoroastrian-Parsi mitochondrial sequence, AGENOME-  
108 ZPMS-HV2a-1 (Genbank ID, MT506314), was assembled from a healthy Parsi female by  
109 combining the sequence data generated from two next-generation sequencing (NGS) platforms  
110 using the protocol outlined in Materials and Methods. Our approach combines the sequencing  
111 depth and accuracy of short-read technology (Illumina) with the coverage of long-read technology  
112 (Nanopore). QC parameters for mitochondrial reads, mitochondrial coverage, and the extent of  
113 coverage were found to be optimal (**Supplementary Figure 1**). The hybrid Zoroastrian-Parsi  
114 mitochondrial genome was assembled as a single contig of 16.6 kb (with 99.82% sequence  
115 identity), resulting in the first *de novo* Zoroastrian-Parsi mitochondrial sequence, with 99.84%  
116 sequence identity with the revised Cambridge Reference Sequence (rCRS<sup>21</sup>).

117

### 118 **Identification of 28 unique variants in AGENOME-ZPMS-HV2a-1**

119

120 A total of 28 significant variants were identified by BLAST alignment between the Parsi  
121 mitochondrial hybrid assembly and the rCRS<sup>20</sup> (**Figure 1A, B**). To confirm their authenticity, we  
122 selected a total of 7 identified variants from the D-loop region and one SNP from the *COI* gene  
123 (m.C7028T) and subjected them to Sanger sequencing. All 8 predicted variants were confirmed  
124 (**Supplementary Figure 2**).

125

126 The majority of the variants identified in the AGENOME-ZPMS-HV2a-1 (n=11) were found in  
127 the hypervariable regions (HVRI and HVRII) of the D-loop in comparison to other individual  
128 regions in the mitochondrial genome sequence. Of the remaining 17 variants, eight were found to  
129 represent synonymous variants, while four were in genes for 12S rRNA, 16S rRNA (n=3), and  
130 tRNA (n=1) (**Figure 1A**). The remaining 5 nonsynonymous variants were located (one each)  
131 within the genes for *ATPase6* (m8860G>A), *COIII* (m.9336 A>G), and *ND4* (m.11016 G>A),  
132 while two were located in the *CytB* gene (m15326 A>G and m15792 T>C) (**Figure 1B**). Except  
133 for the *ATPase6* gene variant, whose occurrence is associated with mitochondrial degenerative diseases  
134 like Alzheimers, Lebers Hereditary Optic Neuropathy (LHON) and idiopathic cardiomyopathy<sup>21</sup>,  
135 no other disease associations were found in the published literature.

136

137 Given that the Parsis are known to have originated in Persia (present day Iran) and have practiced  
138 endogamy since their arrival on the Indian subcontinent, we wished to determine the mitochondrial  
139 haplogroup associated with the AGENOME-ZPMS-HV2a-1. We therefore compared the variants

140 associated with this sequence to standard haplogroups obtained from MITOMAP and determined  
141 the haplogroup to be HV2a (**Figure 1B**). This haplogroup is known to have originated in Iran<sup>25</sup>,  
142 suggesting Persian ancestry for this Parsi individual.

143

#### 144 **Seven major haplogroups identified in the 100 Parsi individuals**

145

146 Keeping in mind the endogamous customs of the Indian Parsis and to understand the extent of the  
147 diversity of the mitochondrial haplogroups in this population, we analyzed mitochondrial genomes  
148 from 100 consenting Parsi individuals. Our study had an equal representation of both genders, and  
149 60% of the subjects were of age 30–59 (mean age 50±1.6, **Figure 2A**). Complete analysis of the  
150 variants in the 100 Parsi samples identified a total of 420 distinct variants (**Figure 2B, Appendix**  
151 **1**). QC analysis of the 100 mitochondrial genomes sequenced determined them to be optimal  
152 (PHRED>30, **Supplementary Figure 3**). Variant distribution in the coding region normalized to  
153 gene length showed that the *ND6* gene had the greatest number of variants (**Supplementary**  
154 **Figure 4**).

155

156 The 100 Parsi mitochondrial genomes were subjected to haplogroup analysis using a haplogroup-  
157 specific variant assignment matrix from MITOMAP (**Appendix 4**). The variant-based haplogroup  
158 assignments classified the genomes as HV, U, T, A and F (belonging to the macrohaplogroup N)  
159 and Z and other M descendants of the macrohaplogroup M (M5, M39, M33, M44'52, M24, M3,  
160 M30, M2, M4'30, M2, M35 and M27) (HV, U, T, M, A, F, and Z), and 25 sub-haplogroups were  
161 identified within these principal haplogroups (**Table 1**). Additional analysis of haplogroup  
162 classification indicated alternate haplogroup calls for A2v (Alternate call: H; A2v:7 variants, H:7  
163 variants), M24a (Alternate call:M37; M24a:25 variants, M37:25 variants), M27b (Alternate  
164 call:M30b; M27b:25 variants, M30b:25 variants), T2b (Alternate call: R30b; T2b:14 variants,  
165 R30b:13 variants), Z1a (Alternate call:M37a; Z1a:26 variants, M37a:25 variants). The variant  
166 count across all sub-haplogroups was in the range 14–64 (**Supplementary Figure 5A**). Analysis  
167 of the sub-haplogroups demonstrated that HV2a was the single largest sub-haplogroup within the  
168 Parsi population (n=14, n=9 females, n=5 males, **Supplementary Figure 5B**), including the  
169 AGENOME-ZPMS-HV2a-1 subject.

170

171 All subjects of sub-haplogroup HV2a (n=14) contained the 27/28 variants observed in the  
172 AGENOME-ZPMS-HV2a-1 sequence. In total, the HV2a sub-haplogroup had 38 variants, with  
173 the highest number in the HVRII region (n=8). Coding region mutations constituted 20/38 variants,  
174 with an equal distribution between synonymous (n=10) and nonsynonymous (n=10) substitutions  
175 observed for this sub-haplogroup. Among the coding regions, the greatest number of variants was  
176 found in the gene encoding *COI* (n=6, **Supplementary Figure 6A**). We found a variant in the  
177 gene encoding tRNA[R] at m.10410 T>C (n=14 subjects), but no mutations were observed in the  
178 D-loop region for the entire group under analysis.

179

180 Further analysis of the other sub-haplogroups revealed that the majority of the variants in the  
181 noncoding region occurred in HVRII and HVRI, while in the gene-coding regions, the majority of  
182 variants occurred in the *CYTB* gene, followed by variants in the *ND5*, *ND2*, *12S RNR1*, and *16S*  
183 *RNR2* genes (**Supplementary Figure 6A–E**).

184

### 185 **Comparative phylogenetic analysis of the Parsi mitochondrial genomes**

186

187 A comparative analysis of 100 Parsi mitochondrial genomes with 352 Iranian<sup>22</sup> and 100 random  
188 Indian mitochondrial genome sequences<sup>23-25</sup> was undertaken. The rationale for selection of the  
189 Iranian and Indian populations for comparative analysis was centered around their shared ancestral  
190 migration history<sup>26,27</sup>.

191

192 We compared the haplogroups identified in the Parsi population with those in the Iranian  
193 mitogenome dataset. The Persians (n=180) and the Qashqais (n=112) were the most frequently  
194 represented in the Iranian population in the 352 Iranian mitogenome study<sup>22</sup> when compared with  
195 the Iranian population haplogroups, we found that a) all Parsi haplogroups (HV, U, T, A, F, and  
196 Z) and lineages of the macrohaplogroup M observed in the Parsis were also seen in the Iranian  
197 population and b) there was a marked lack of haplogroup diversity in the Parsi dataset (25 sub-  
198 haplogroups) compared to the Persians (125 sub-haplogroups) and Qashqais (77 sub-haplogroups)  
199 (**Figure 3A, B, Appendix 7**). The reason for the lack of haplotype diversity may lie in the practice  
200 of endogamy, which has been strictly followed by the Parsi community for centuries.  
201 Contemporary Iranians belong to a broader range of haplogroups, perhaps due to admixture events  
202 following political upheavals in the region<sup>27</sup>.

203

204 Our analysis revealed that the Parsis predominantly cluster with populations from Iran (Persians  
205 and people of Persian descent, **Figure 4A, E**). For example, the most common HV sub-haplogroup  
206 (HV2a, n=14) clustered with Persians (neighbour-joining tree weight >72%, **Figure 4A and**  
207 **Supplementary Table 3**), while the single Parsi in the HV12b sub-haplotype (n=1) clustered with  
208 with other Iranian ethnic groups in the dataset of 352 Iranian mitogenomes, including the  
209 Khorasanis and Mazandarans, in addition to the Qashqais and Persians (**Supplementary Table**  
210 **3**). The Parsis in the macro-haplogroups U, T, A, F, and Z also cluster with Persians, while there  
211 were secondary associations with Kurds, Turkmen, Mazandarans, Armenians, Azeris, and  
212 Khorasanis (**Figure 4B, C**), all of whom claim descent from Mesopotamia and the older Persian  
213 empire<sup>22</sup>

214

215 Unlike the HV, U, and T haplogroups, for which the Parsis cluster closely with Persians, the Parsis  
216 harboring the M haplogroup appear to demonstrate more diversity in their mitochondrial genomes.  
217 This study showed the following breakdown: 8/12 M sub-haplogroups of the 29 Parsi M  
218 haplotypes (M24a [n= 8], M33a [n=1], M5a [n=2], M4a [n=1]), M3a [n=7], M52b [n=8], M27b  
219 [n=1], and M35b [n=1]) clustered with the Persians, Qashqais, Azeris of Iranian ethnicity, and



220 others of Persian descent (**Figure 4D, Supplementary Table 3**). Only two sub-haplogroups in our  
221 study (M2a and M2b [n=21], M30d [n=1], **Figure 4D**) clustered with relic tribes of Indian origin.  
222 Our phylogenetic analyses further showed that 19 Parsi individuals belonging to the M30d (n=10)  
223 and M39d (n=9) haplogroups did not cluster either with Indian or Iranian ethnic groups (**Figure**  
224 **4D**) but remained clustered within their own subgroups.

225  
226 Outgroup sampling is of primary importance in phylogenetic analyses, affecting in-group  
227 relationships, and, by correctly placing the root, determining the sequence of branching events.  
228 Accordingly, we used the AGENOME-OUTGROUP-Y2b sequence to root the phylogenetic tree.  
229 This sequence did not associate with the Parsis, Indians, or Iranians, attesting to the robustness of  
230 this method employed for phylogenetic analysis (**Figure 4E**, black line).

231  
232 **Assembly of the Zoroastrian Parsi Mitochondrial Consensus Genome (AGENOME-**  
233 **ZPMC-G-V1.0) and Parsi haplogroup-specific reference sequences**

234  
235 To better understand the nuances of disease and wellness in this unique community, we generated  
236 the Zoroastrian Parsi Mitochondrial Consensus Genome (AGENOME-ZPMC-G V1.0; Genbank  
237 ID, MT506339). We also assembled seven individual haplogroup-based reference genomes,  
238 including AGENOME-ZPMRG-HV-V1.0 (n=15; Genbank ID, MT506342), AGENOME-  
239 ZPMRG-U-V1.0 (n=20; Genbank ID, MT506345), AGENOME-ZPMRG-T-V1.0 (n=5; Genbank  
240 ID, MT506344), AGENOME-ZPMRG-M-V1.0 (n=52; Genbank ID, MT506343), AGENOME-  
241 ZPMRG-A2v-V1.0 (Genbank ID, MT506340), AGENOME-ZPMRG-F1a-V1.0 (Genbank ID,  
242 MT506341), and AGENOME-ZPMRG-Z-V1.0 (Genbank ID, MT506346) (**Supplementary**  
243 **Table 4, Appendix 2**).

244  
245 Additionally, using all 100 Parsi mitochondrial genome sequences generated in this study (see  
246 Materials and Methods), we built the first Zoroastrian-Parsi mitochondrial consensus genome  
247 (AGENOME-ZPMC-G-V1.0). The consensus Parsi mtDNA sequence was found to have 31 unique  
248 variants (**Supplementary Table 5**), of which five (A263G, A750G, A1438G, A4769G, and  
249 A15326G) were found to be common to the reference sequences of all seven haplogroups  
250 considered (**Supplementary Table 5**). While the number of variants unique to each of the seven  
251 haplogroups ranged from 11 to 33, haplogroup M did not appear to have any unique variants when  
252 compared with the overall consensus sequence (AGENOME-ZPMC-G-V1.0).

253  
254 **mtDNA variant-specific disease associations in the non-smoking Parsi cohort**

255  
256 Comparison of mitochondrial sequence data from the WGS of 100 Parsi subjects with the revised  
257 Cambridge Reference Sequence (rCRS) standard resulted in identification of 420 distinct variants.  
258 Further analysis with VarDiG<sup>®</sup>-R, a database of genes and disease variants, identified 217 unique

259 variants associated with 41 disease phenotypes, which were further classified according to the  
260 seven major haplogroups and their 25 sub-haplogroups.

261

## 262 **Haplogroup and disease linkage**

263

264 Principal component analysis (PCA) showed the associations between variants and haplogroups.  
265 Longevity variants in the Parsi sub-haplogroups were found to be associated with Parkinson's  
266 disease (PD), Alzheimer's disease (AD), breast cancer, and cardiomyopathy in 23/25 sub-  
267 haplogroups (HV2a, U7a, U4b, T1a, T2g, T2i, T2b, M5a, M39b, M33a, M52b, M24a, M3a, M30d,  
268 M2a, M4a, M2b, M35b, M27b, A2v, F1g, and Z1a). Longevity variants were absent in only 2/25  
269 sub-haplogroups (HV12b and U1a, **Figure 5A**). We found a close association between variants  
270 and PD in most haplogroups (**Appendix 3**), while further analysis revealed linkages to colon  
271 cancer in 13/23 longevity-linked sub-haplogroups. Previously reported lung cancer and non-small  
272 cell lung cancer-associated variants<sup>28,29</sup> that were found occurring in the 16S RNR2, *ND5*, *ND6*,  
273 and tRNA genes were absent in the 420 variants in the Parsi population (**Appendix 6**).

274

## 275 **Variant analysis**

276

277 Given the importance of mitochondrial heteroplasmy in the etiology of diseases, we implemented  
278 a bioinformatic pipeline to detect heteroplasmies in our sample set using Mutserver (mtDNA-  
279 Server Version 1.0.7) variant caller for the mitochondrial genome with a minimum heteroplasmy  
280 level with a stringent threshold value of 0.05 (5%). Our analysis detected 24 unique high  
281 confidence heteroplasmies from the 420 distinct variants across the 100 samples at a minimum  
282 heteroplasmy level threshold  $\geq 0.05$  (5%) and mean coverage  $\geq 500X$  (**Appendix 8**)

283

284 Further analysis of the 420 variants revealed a putative association between PD and our variants  
285 (**Supplementary Figure 7**), neurodegenerative diseases, rare diseases of mitochondrial origin, and  
286 cardiovascular and metabolic diseases in our study. (**Supplementary Figure 7**).

287

288 While predispositions for 41 diseases were spread across 25 sub-haplogroups, many disease  
289 variants were found to recur across haplogroups, totalling 188 instances of disease variants  
290 (**Supplementary Figure 8A**). Haplogroup U4b harbored 15 disease-associated variants, while the  
291 majority of M and T groups had 5 variants (Figure 6B). Some of the mitochondrial rare diseases,  
292 such as mitochondrial encephalomyopathies, Mitochondrial Encephalopathy, Lactic Acidosis, and  
293 Stroke-like episodes (MELAS syndrome), and cytochrome c oxidase deficiency were found to be  
294 associated with the M2a and U1a; U4b; and M2b sub-haplogroups, respectively (**Supplementary**  
295 **Figure 8B**).

296

297 Further analysis of the nucleotide transitions and transversions that constitute the 420 variants  
298 revealed that the mutational signatures (C>A and G>T) found in tobacco smoke-derived cancers<sup>30</sup>  
299 were found at an extremely low frequency (<6% compared with other mutational signatures) on



300 both the heavy (H) and light (L) strands of the mitochondrial genomes of the Parsi population  
301 (**Figure 5B**), who are known to refrain from smoking due to their religious and social habits.

302

### 303 **Analysis of the variants in tRNA genes and the D-loop region in the mitochondrial genome**

304

305 In order to determine whether diseases known to be prevalent in the Parsi community could in fact  
306 be predicted by association using the collective mitochondrial variants discovered in this study,  
307 we first analyzed variants identified in tRNA genes that have previously been implicated in rare  
308 and degenerative diseases. We found a total of 17 tRNA-associated variants, with a pathogenic  
309 variant (G1644A) implicated significantly in adult onset-Leigh Syndrome (LS)/Hypertrophic  
310 CardioMyopathy (HCM)/MELAS, a genetically inherited mitochondrial disease<sup>31</sup>. We also found  
311 a total of six tRNA mutations associated with nonsyndromic hearing loss, hypertension,  
312 breast/prostate cancer risk, and progressive encephalopathies in the analysis of our 100  
313 Zoroastrian-Parsi individuals (**Supplementary Table 6**).

314

315 While synonymous/neutral variants in mtDNA genome sequences do not affect mitochondrial  
316 function, nonsynonymous/non-neutral variants may have functional consequences. We therefore  
317 analyzed the 420 variants from 100 Parsi subjects for nonsynonymous mutations and identified 63  
318 such variants located within different mitochondrial genes (**Figure 6A**). Twenty of 63 variants  
319 were found in the genes encoding *CYTB* (n=13) and *ND2* (n=7), followed by *ND5* and *ND1*.  
320 Annotation of disease pathway-association analysis with MitImpact server, showed the association  
321 of non-synonymous variants in our study with disease pathways for neurodegenerative conditions,  
322 such as AD and PD; cancers of colorectal and prostate origin; metabolic diseases, such as type 2  
323 diabetes; and rare diseases, such as Lebers Hereditary Optic Neuropathy (LHON) (*CYTB* and *ND2*)  
324 (**Supplementary Figures 9 and 10**). Variants implicated in longevity were observed in our study  
325 and distributed across the *ND2* gene (**Supplementary Figure 8B**). As mentioned above, we found  
326 no association between the nonsynonymous variants in our data set and lung cancer.

327

328 To understand the mitochondrial pathways affected by the non-synonymous variants in our study,  
329 we annotated the variants with DAVID and UNIPROT and found that the major genes *CYTB* and  
330 *ND2* were implicated in pathways that include the mitochondrial respiratory complex  
331 (*COI/COII/COIII/COIV*), OXPHOS, and metabolic pathways implicated in mitochondrial  
332 bioenergetics. Critical disease-related pathways in PD, AD, and cardiac muscle contraction were  
333 also associated with *CYTB*- and *ND2*-specific variants, which possibly explains the high incidence  
334 of these diseases in the Parsi population (**Supplementary Figure 10**).

335

336 A total of 87 variants, including 6 unique variants, were observed in the D-loop region across all  
337 25 sub-haplogroups (n=100 subjects, **Supplementary Table 2**). Seventy-four of 100 Parsis in our  
338 study were found to have the polymorphism m.16519 T>C. Six subjects of the M52 sub-  
339 haplogroup were found to have the m.16525 A>G substitution. The rest of the variants were

340 m.16390 G>A (n=4 subjects) and m.16399 A>G, m.16401 C>T, and m.16497 A>G (all with n=1  
341 subject each).

342

### 343 **Identification of unique, unreported variants from the mitogenome analysis of 100 Parsi** 344 **subjects**

345

346 We performed a comparative analysis of the 420 variants in the Parsi community with  
347 MITOMASTER<sup>32</sup>, a database that contains all known pathogenic mtDNA mutations and common  
348 haplogroup polymorphisms, to identify unique variants in our population that were not previously  
349 reported. Our analysis showed the presence of 12 unique variants distributed across 27 subjects  
350 that were not observed in MITOMASTER nor in the VarDIG<sup>®</sup>-R disease-association dataset  
351 (**Figure 7, Appendix 5**). These unique variants were observed at different gene loci, including 12S  
352 rRNA (2 variants), 16S rRNA (5 variants), and 1 variant each in the *ND1*, *COII*, *COIII*, *ND4*, and  
353 *ND6* genes. SNP haplogroup-association analysis showed that they fell into four major  
354 haplogroups and 13 sub-haplogroups: HV2a (n=1), M24a (n=4), M2a (n=1), M30d (n=3), M35b  
355 (n=1), M39b (n=2), M3a (n=1), M4a (n=1), M52b (n=4), M5a (n=1), T2b (n=1), U4b (n=6), and  
356 U7a (n=1). Of the 12 variants identified, no disease associations were observed by analysis with  
357 MITOMASTER or VarDIG<sup>®</sup>-R.

358

359

### 360 **Discussion**

361

362 The first *de novo* Parsi mitochondrial genome, AGENOME-ZPMS-HV2a-1 (Genbank accession,  
363 MT506314), from a healthy, non-smoking female of haplogroup HV2a showed 28 unique variants  
364 compared with the revised Cambridge Reference Standard (rCRS). Upon extending our  
365 mitochondrial genome analyses to an additional 99 Parsi individuals, we found that 94 individuals  
366 belonged to four major mitochondrial haplogroups HV, U, T, A (belonging to the macrohaplogroup  
367 N) and other M descendents of the macrohaplogroup M (M5, M39, M33, M44'52, M24, M3, M30,  
368 M2, M4'30, M2, M35 and M27) , while 5 individuals belonged to the rarer haplogroups A, F, and  
369 Z. The largest sub-haplogroup was found to be HV2a (n=14).

370

371 . Phylogenetic analysis of the major mitochondrial haplogroups in our Parsi cohort with 352  
372 Iranian<sup>22</sup> and 100 Indian mitochondrial genomes<sup>23-25</sup>, revealed that the Parsi genomes are  
373 phylogenetically related to the Persians and Qashqais<sup>22</sup> in the HV, T, U, F, A, and Z haplogroups,  
374 which are those associated with the peopling of western Europe, Central Asia, and the Iranian  
375 plateau.

376

377 The haplogroup HV2 most likely arose in Persia, and the subclade HV2a has a demonstrated  
378 Persian ancestry. HV12b, a branch of the HV12 clade, is one of the oldest HV subclades and has  
379 been found in western Iran, India, and sporadically as far away as Central and Southeast Asia. It  
380 has strong associations with the Qashqais, who are Turkic-speaking nomadic pastoralists of

381 southern Iran and who previously resided in the Iranian region of the South Caucasus<sup>33,36</sup>. Among  
382 the U haplogroup, the U4b and U7a haplotypes are distributed throughout the Central Asia in the  
383 Volga–Ural region<sup>34</sup>, South Asia<sup>25</sup>, and with lower frequencies in populations around the Baltic  
384 Sea<sup>33</sup>. Haplogroup U2 is found primarily in South Asia, whereas U2d and U2e are confined to the  
385 Near East and Europe<sup>24</sup>. The T haplogroup is also widely distributed in Eastern and Northern  
386 Europe, the Indus Valley, and the Arabian Peninsula following expansion during the Neolithic  
387 transition<sup>34</sup>. The presence of the predominantly Eurasian mtDNA haplotypes (HV, T, U, F, A, and  
388 Z) in our Parsi cohort attests to their practice of endogamy, given that the Parsis have resided on  
389 the Indian subcontinent for over 1300 years.

390  
391 Despite the high frequency of the M haplogroup (the largest haplogroup in the Indian  
392 subcontinent<sup>35</sup>) in our Parsi cohort, phylogenetic analysis showed that 47/51 Parsis belonging to  
393 the M haplogroups in our study cluster with the Persians, suggesting Persian descent, with a small  
394 minority of Parsis found to be related to relic tribes of India. This observation suggests minimal  
395 gene flow from indigenous Indian females into the Parsi gene pool, as was previously proposed<sup>26</sup>.  
396 Phylogenetic analysis also revealed that two Parsi M sub-haplogroups, M30d and M39b, formed  
397 a unique cluster that needs further resolution.

398  
399 We further present the first complete Zoroastrian Parsi mitochondrial consensus genome  
400 (AGENOME-ZPMCG V1.0), built from the mitochondrial genomes of 100 non-smoking Parsi  
401 individuals, representing seven mitochondrial haplogroups. The generation of a unique population-  
402 specific consensus genome for the Parsis is useful for comparative analyses and in reconstructing  
403 their population history, migration pattern, and disease associations.

404  
405 We found that the *CYTB* gene contained the greatest number of variants ( $n \geq 5$ ) in the coding region  
406 of haplogroup M, besides having the greatest representation in the F1g, T, and HV12b  
407 haplogroups. Haplogroups U, A2v, and Z1a showed a predominance of the variants linked to the  
408 ND complex genes *ND5* and *ND2*, while the *COI* gene variants were the most highly represented  
409 in HV2a and U4b. Variants in the *CYTB* gene are associated with Alzheimer's disease (AD),  
410 diabetes mellitus, cognitive ability, breast cancer, hearing loss, and asthenozoospermia and are  
411 associated with changes in metabolic pathways, cardiac contraction, and rare diseases, such as  
412 Huntington's disease, whereas the *ND2* and *ND5* variants are associated with prostate cancer;  
413 ovarian cancer; rare mitochondrial neuronal diseases, such as LHON; cardiomyopathy; AD; and  
414 Parkinson's disease (PD).

415  
416 Interrogation of the 420 variants across seven haplogroups in the Parsi cohort using the VarDIG<sup>®</sup>-  
417 R database revealed that PD, known to be prevalent in the Parsi community<sup>37</sup>, was the most  
418 prevalent, with 178 of the 420 variants represented. Not surprisingly, longevity, which often co-  
419 occurs with PD, was also predicted to be highly prevalent in the Parsi cohort, but with a notable  
420 absence in the U1 sub-haplogroup, an interesting observation that warrants further investigation.

421  
422 Analysis of additional disease associations revealed that variants related to AD (also related to  
423 ageing), breast cancer, and cardiomyopathies<sup>38,39,40</sup>, were all the 25 Parsi sub-haplogroups.  
424 Additionally, the presence of variants associated with asthenozoospermia<sup>41</sup> in the T1a sub-  
425 haplogroup, a condition associated with reduced sperm motility. The ‘T1a’ is a rare group in our  
426 analysis of the 100 mitogenomes sequenced (2/100) perhaps indicative of a slow decline of this  
427 particular haplogroup in the population moving to a possible extinction as it is a documented that  
428 the fertility rates in the community is on a steady decline.

429  
430 It is noteworthy that previously published epidemiological studies demonstrating lower rates of  
431 lung cancer among the Parsis<sup>42</sup>, appears to have a genetic basis, given that no haplogroup in the  
432 Parsi cohort displayed known lung cancer-associated variants. The low frequency of mutational  
433 signatures for tobacco smoke-derived cancers, is in line with the non-smoking customs of the Parsi  
434 community.

435  
436 The tRNA disease-association analysis in our study showed that these genes were implicated in  
437 the onset of neurodegenerative conditions, such as AD; PD; cancers of colorectal and prostate  
438 origin; metabolic diseases, such as type 2 diabetes; and rare diseases, such as LHON (*CYTB* and  
439 *ND2*). The D-loop SNP analysis showed the prevalence (74/100 subjects) of the m.16519 T>C  
440 polymorphism, which has been implicated in chronic kidney disease<sup>43</sup>, an increased risk of  
441 Huntington’s disease, cyclic vomiting syndrome<sup>44</sup>, schizophrenia, and bipolar disorder<sup>45</sup>. Taken  
442 together, these results warrant a deeper investigation into the tRNA and the D-loop variants in the  
443 Parsi community.

444  
445 Our Parsi population genetics study has shown for the first time the existence of haplogroup-  
446 specific variants and their disease associations with longevity, neurodegenerative diseases,  
447 cancers, and rare disorders. The Parsis represent a small, unique, non-smoking community in  
448 which genetic signatures maintained by generations of endogamy, provide an exceptional  
449 opportunity to understand genetic predispositions to various diseases.

## 450 451 **Methods**

### 452 453 **Sample collection and ethics statement**

454 One hundred healthy, non-smoking Parsi volunteers residing in the cities of Hyderabad-  
455 Secunderabad and Bangalore, India were invited to attend blood collection camps at the  
456 Zoroastrian centers in their respective cities under the auspices of The Avestagenome Project<sup>TM</sup>.  
457 Each adult participant (>18 years) underwent height and weight measurements and answered an  
458 extensive questionnaire designed to capture their medical, dietary, and life history. All subjects  
459 provided written informed consent for the collection of samples and subsequent analysis. All

460 health-related data collected from the cohort questionnaire were secured in The Avestagenome  
461 Project™ database to ensure data privacy.

462

### 463 **Genomic DNA extraction**

464 Genomic DNA from the buffy coat of peripheral blood was extracted using the Qiagen Whole  
465 Blood and Tissue Genomic DNA Extraction kit (cat. #69504). Extracted DNA samples were  
466 assessed for quality using the Agilent Tape Station and quantified using the Qubit™ dsDNA BR  
467 Assay kit (cat. #Q32850) with the Qubit 2.0® fluorometer (Life Technologies™). Purified DNA  
468 was subjected to both long-read (Nanopore GridION-X5 sequencer, Oxford Nanopore  
469 Technologies, Oxford, UK) and short-read (Illumina sequencer) sequencing.

470

### 471 **Library preparation for sequencing on the Nanopore platform**

472 Libraries of long reads from genomic DNA were generated using standard protocols from Oxford  
473 Nanopore Technology (ONT) using the SQK-LSK109 ligation sequencing kit. Briefly, 1.5 µg of  
474 high-molecular-weight genomic DNA was subjected to end repair using the NEBNext Ultra II End  
475 Repair kit (NEB, cat. #E7445) and purified using 1x AmPure beads (Beckman Coulter Life  
476 Sciences, cat. #A63880). Sequencing adaptors were ligated using NEB Quick T4 DNA ligase (cat.  
477 #M0202S) and purified using 0.6x AmPure beads. The final libraries were eluted in 15 µl of elution  
478 buffer. Sequencing was performed on a GridION X5 sequencer (Oxford Nanopore Technologies,  
479 Oxford, UK) using a SpotON R9.4 flow cell (FLO-MIN106) in a 48-hr sequencing protocol.  
480 Nanopore raw reads (fast5 format) were base called (fastq5 format) using Guppy v2.3.4 software.  
481 Samples were run on two flow cells and generated a dataset of ~14 GB.

482

### 483 **Library preparation and sequencing on the Illumina platform**

484 Genomic DNA samples were quantified using the Qubit fluorometer. For each sample, 100 ng of  
485 DNA was fragmented to an average size of 350 bp by ultrasonication (Covaris ME220  
486 ultrasonicator). DNA sequencing libraries were prepared using dual-index adapters with the  
487 TruSeq Nano DNA Library Prep kit (Illumina) as per the manufacturer's protocol. The amplified  
488 libraries were checked on a Tape Station (Agilent Technologies) and quantified by real-time PCR  
489 using the KAPA Library Quantification kit (Roche) with the QuantStudio-7flex Real-Time PCR  
490 system (Thermo). Equimolar pools of sequencing libraries were sequenced using S4 flow cells in  
491 a Novaseq 6000 sequencer (Illumina) to generate 2 x 150-bp sequencing reads for 30x genome  
492 coverage per sample.

493

### 494 **Generation of the *de novo* Parsi mitochondrial genome (AGENOME-ZPMS-HV2a-1)**

495 a) Retrieval of mitochondrial reads from whole-genome sequencing (WGS) data:

496 A total of 16 GB of raw data (.fasta) was generated from a GridION-X5 Nanopore sequencer for  
497 AGENOME-ZPMS-HV2a-1 from WGS. About 320 million paired-end raw reads were generated  
498 for AGENOME-ZPMS-HV2a-1 by Illumina sequencing.

499



500 Long Nanopore reads (. fastaq5) were generated from the GridION-X5 samples. The high-quality  
501 reads were filtered (PHRED score =>20) and trimmed for adapters using Porechop (v0.2.3). The  
502 high-quality reads were then aligned to the human mitochondrial reference sequence (rCRS)  
503 NC\_12920.1 using Minimap2 software. The aligned SAM file was then converted to a BAM file  
504 using SAMtools. The paired aligned reads from the BAM file were extracted using Picard tools  
505 (v1.102).

506

507 The short Illumina high-quality reads were filtered (PHRED score =>30). The adapters were  
508 trimmed using Trimgalore (v0.4.4) for both forward and reverse reads, respectively. The filtered  
509 reads were then aligned against a human mitochondrial reference (rCRS<sup>21</sup>) using the Bowtie2  
510 (v2.2.5) aligner with default parameters. The mapped SAM file was converted to a BAM file using  
511 SAMtools, and the mapped paired reads were extracted using Picard tools (v1.102).

512

513 b) *De novo* mitochondrial genome assembly

514 Mapped reads were used for *de novo* hybrid assembly using the Maryland Super-Read Celera  
515 Assembler (MaSuRCA-3.2.8) tool. The configuration file from the MaSuRCA tool was edited by  
516 adding appropriate Illumina and Nanopore read files. The MaSuRCA tool uses a hybrid approach  
517 that has the computational efficiency of the de Bruijn graph methods and the flexibility of overlap-  
518 based assembly strategies. It significantly improves assemblies when the original data are  
519 augmented with long reads. AGENOME-ZPMS-HV2a-1 was generated by realigning the mapped  
520 mitochondrial reads from Illumina as well as Nanopore data with the initial assembly.

521

522 **Confirmation of variants in the *de novo* Parsi mitochondrial genome using Sanger**  
523 **sequencing**

524 To validate the *de novo* Parsi mitochondrial sequence (AGENOME-ZPMS-HV2a-1), selected  
525 variants were identified and subjected to PCR amplification. Genomic DNA (20 ng) was PCR  
526 amplified using LongAmpTaq 2X master mix (NEB). The PCR amplicons of selected regions were  
527 subjected to Sanger sequencing and BLAST analysis to confirm the presence of eight variants  
528 using the primers listed in Supplemental Table 1.

529

530 **Generation of the Zoroastrian-Parsi Mitochondrial Consensus Genome (AGENOME-**  
531 **ZPMCG-V1.0) and Parsi haplogroup-specific consensus sequences**

532 a) **Retrieving mitochondrial reads from 100 Parsi whole-genome sequences**

533 The whole-genome data from 100 Parsi samples were processed for quality assessment. The  
534 adapters were removed using the Trimgalore 0.4.4 tool for paired end reads (R1 and R2), and sites  
535 with PHRED scores less than 30 and reads shorter than 20 bp in length were removed. The  
536 processed Illumina reads were aligned against a human mitochondrial reference sequence (rCRS<sup>21</sup>,  
537 NC\_012920.1) using the Bowtie 2 (v2.4.1) aligner with default parameters. Mapped reads were  
538 further used for the *de novo* assembly using SPAdes (v3.11.1), Velvet, and IVA (v1.0.8).  
539 Comparison of the assembly and statistics were obtained using Quast (v5.0.2). The assembled



540 scaffolds were subjected to BLASTn against the NCBI nonredundant nucleotide database for  
541 validation.

542

543 Additionally, we have implemented an extra QC step to deal numt sequences by implementing  
544 RtN pipeline<sup>46</sup> that retains reads that map using sequence similarity to an extensive database of  
545 publicly available mitochondrial genomes. RTN uses annotated genomes from HmtDB. RtN!  
546 removes low-level sequencing noise and mitochondrial paralogs while not impacting variant  
547 calling. It retains mitochondrial reads from the input .bam file that are an exact match to known  
548 mitochondrial genome sequences in the HmtDB, otherwise it's mapping quality is set to 0. RTN  
549 also maps to database of annotated allele

550

#### 551 **b) Variant calling, hetroplasmly detection and haplogroup classification**

552 Sequencing reads were mapped to the human mitochondrial genome (rCRS<sup>21</sup>) assembly using the  
553 MEM algorithm of the Burrows–Wheeler aligner (v0.7.17-r1188) with default parameters.  
554 Variants were called using SAMtools (v1.3.1) to transpose the mapped data in a sorted BAM file  
555 and calculate the Bayesian prior probability. Next, Bcftools (v1.10.2) was used to calculate the  
556 prior probability distribution to obtain the actual genotype of the variants detected. The  
557 classification and haplogroup assignment were performed for each of the 100 Parsi mtDNAs after  
558 variant calling and after mapping reference and alternate alleles to the standard haplogroups  
559 obtained from MITOMAP (**Appendix 4**).

560

561 For the mitochondrial heteroplasmy analysis, we implemented a bioinformatic pipeline to detect  
562 heteroplasmies in our sample set using Mutserver run locally (mtDNA-Server Version 1.0.7)  
563 variant caller for the mitochondrial genome with a Minimum heteroplasmy level with a stringent  
564 threshold value of 0.05 (5%). Our threshold/cutoff was based on literature evidence that indicated  
565 a cut off of 50–60% for high levels of mutant mtDNA alleles for the emergence of mitochondrial  
566 pathology while further evidence of lower levels of heteroplasmy (not exceeding 30–40%) of  
567 certain mtDNA mutations increase the risk of age-related chronic diseases<sup>47</sup>.

568

#### 569 **c) Haplogroup-based consensus sequence**

570 Ninety-seven of 100 full-length Parsi mitogenome sequences were segregated based on  
571 haplogroups and separately aligned using the MUSCLE program to obtain the multiple sequence  
572 alignments. The Zoroastrian-Parsi Mitochondrial Reference Genome (ZPMRG) and the Parsi  
573 haplogroup-specific consensus sequences were generated after calculation of the ATGC base  
574 frequency by comparison of the nucleotides in an alignment column to all other nucleotides in the  
575 same column called for other samples at the same position. The highest frequency (%) was taken  
576 to build seven Parsi haplogroup ZPMRGs and the seven Parsi haplogroup-specific consensus  
577 sequences.

578

579

## 580 **Phylogeny build and analysis**

581 Ninety-seven of 100 full-length Parsi mitogenome sequences generated as described above were  
582 compared with 100 randomly chosen Indian mtDNA sequences derived from NCBI Genbank  
583 under the accession codes FJ383174.1-FJ 383814.1<sup>23</sup>, DQ246811.1-DQ246833.1<sup>24</sup>, and  
584 KY824818.1-KY825084.1<sup>25</sup> and from previously published data on 352 complete Iranian mtDNA  
585 sequences<sup>22</sup>. All mtDNA sequences were aligned using MUSCLE software<sup>48</sup> using the “maxiters  
586 2” and “diags 1” options, followed by manual verification using BioEdit (v7.0.0). Following  
587 alignment, the neighbor-joining method, implemented in MEGAX<sup>49</sup>, was employed to reconstruct  
588 the haplotype-based phylogeny. This method was used, because it is more efficient for large data  
589 sets<sup>50</sup>.

590

## 591 **Variant disease analysis**

592 One hundred Parsi mitochondria sequences extracted from the WGS were uploaded into the  
593 VarDiG<sup>®</sup>-R search engine (<https://vardigrviz.genomatics.life/vardig-r-viz/>) on AmazonWeb  
594 Services. VarDiG-R, developed by Genomatics Private Ltd, connects variants, diseases, and genes  
595 in the human genome. Currently, the VarDiG-R knowledgebase contains manually curated  
596 information on 330,000+ variants and >20 K genes covering >4500 phenotypes, including nuclear  
597 and mitochondrial regions for 150,000+ published articles from 388+ journals. Variants obtained  
598 from Parsi mitochondria were mapped against all the published variants in VarDiG-R.  
599 Associations with putative diseases were ascertained for each variant through VarDIG-R.

600

601 Seventeen tRNA SNP sites were identified in the 100 Parsi mitochondrial SNP data. The PON-  
602 mt-tRNA database<sup>51</sup> was downloaded to annotate the tRNA variants for their impact and disease  
603 associations. This database employs a posterior probability-based method for classification of  
604 mitochondrial tRNA variations. PON-mt-tRNA integrates the machine learning-based probability  
605 of pathogenicity and the evidence-based likelihood of pathogenicity to predict the posterior  
606 probability of pathogenicity. In the absence of evidence, it classifies the variations based on the  
607 machine learning-based probability of pathogenicity.

608

609 For annotation of disease pathways associated with variants, we employed MitImpact  
610 (<https://mitimpact.css-mendel.it/>) to predict the functional impact of the nonsynonymous variants on  
611 their pathogenicity. This database is a collection of nonsynonymous mitochondrial variants and  
612 their functional impact according to various databases, including SIFT, Polyphen, Clinvar,  
613 Mutationtester, dbSNP, APOGEE, and others. The disease associations, functional classifications,  
614 and engagement in different pathways were determined using the DAVID and UNIPROT  
615 annotation tools.

616

## 617 **Haplogroup and disease linkage**

618 Principal component analysis (PCA) was performed to visualize the linkage of the haplogroup  
619 with disease. XLSTAT (Addinsoft 2020, New York, USA. <https://www.xlstat.com>) was used for  
620 statistical and data analysis, including PCA.

621 **List of abbreviations**

622

623 mtDNA, mitochondrial DNA; rCRS, revised Cambridge Reference Sequence; NGS, next-  
624 generation sequencing; ZPMS, Zoroastrian Parsi Mitochondrial Sequence; ZPMRG, Zoroastrian  
625 Parsi Mitochondrial Reference Genome; ZPMCG, Zoroastrian Parsi Mitochondrial Consensus  
626 Genome; PCA, Principal Component Analysis ; AD, Alzheimer’s disease; PD, Parkinson’s  
627 disease ; LHON, Lebers Hereditary Optic Neuropathy ; MELAS, Mitochondrial Encephalopathy,  
628 Lactic Acidosis, and Stroke-like episodes

629

630 **Declarations:**

631

632 **Ethics approval and consent to participate**

633

634 The samples of peripheral blood collected in this study involve human healthy donors and were obtained  
635 with their informed consent. were in accordance with the ethical standards of the institution (Avesthagen  
636 Limited, Bangalore, India) and in line with the 1964 Helsinki declaration and its later amendments. One  
637 hundred healthy, non-smoking Parsi volunteers residing in the cities of Hyderabad-Secunderabad and  
638 Bangalore, India were invited to attend blood collection camps at the Zoroastrian centers in their respective  
639 cities under the auspices of The Avestagenome Project<sup>TM</sup>. Each adult participant (>18 years) underwent  
640 height and weight measurements and answered an extensive questionnaire designed to capture their  
641 medical, dietary, and life history. All subjects provided written informed consent for the collection of  
642 samples and subsequent analysis. This study was approved by the Avesthagen Ethics Committee constituted  
643 under the Department of Biotechnology, Government of India (BLAG-CSP-033).

644

645 **Consent for publication**

646

647 All subjects have provided written informed consent for the collection of samples and subsequent analysis.

648

649 **Availability of data and materials**

650

651 The GenBank (<http://www.ncbi.nlm.nih.gov/genbank>) accession numbers for the 105 novel and  
652 complete mtDNA sequences (97 ZPMS, 7 ZPMRG, and 1 ZPMCG) reported in this article are  
653 numbered MT506242–MT506346 sequentially. The raw reads for 97 ZPMS mitochondrial  
654 genome sequences have been deposited with BioProject ID: PRJNA636291. The SRA accession  
655 numbers for the 97 ZMPS sequences is SRR11888826-SRR11888922.

656

657 **Competing interests**

658

659 The authors declare that they have no competing interests

660

661 **Funding**

662

663 The project was funded by the grant awarded to Dr.Villoo Morawala-Patell “Cancer risk in  
664 smoking subjects assessed by next-generation sequencing profile of circulating free DNA and  
665 RNA” (GG-0005) by the Foundation for a Smoke-Free World, New York, USA.

666

#### 667 **Authors contributions**

668

669 VMP conceptualized, designed ,guided the experiments and analysis; VMP founded The  
670 Avestagenome Project<sup>TM</sup> and provided access to the dataset for this study; NP and CG analysed  
671 the sequences, performed bioinformatics analysis, and interpreted the results; RM, SR, and NS  
672 coordinated wet-lab work flows and data analysis; VMP, NP, BM, and KK analysed the data and  
673 plotted the graphs and figures; VMP, AKG, PB, KK, and RJ drafted the manuscript, with input  
674 from RM, SR, NS, and CG. All authors reviewed the manuscript.

675

#### 676 **Acknowledgements**

677

678 We thank the Foundation for Smoke-Free World, who is advancing global progress in smoking  
679 cessation and harm reduction, for funding this project and Dr. Derek Yach for his support of this  
680 project. We thank National Institute of Bio Medical Genetics, [NIBMG], Kolkata and Center for  
681 Cellular and Molecular Biology [CCMB], Hyderabad for their excellent sequencing services. We  
682 thank the Zoroastrian-Parsi community of India for their enthusiastic cooperation. We thank  
683 Dr.Sami Gazder, Kouser Sonnekhan, and the The Avestagenome Project<sup>TM</sup> project team.

## References

1. Wallace, D. C. Mitochondrial DNA Variation in Human Radiation and Disease. *Cell* (2015) doi:10.1016/j.cell.2015.08.067.
2. Roger, A. J., Muñoz-Gómez, S. A. & Kamikawa, R. The Origin and Diversification of Mitochondria. *Current Biology* (2017) doi:10.1016/j.cub.2017.09.015.
3. Garcia, I., Jones, E., Ramos, M., Innis-Whitehouse, W. & Gilkerson, R. The little big genome: The organization of mitochondrial DNA. *Front. Biosci. - Landmark* (2017) doi:10.2741/4511.
4. Wallace, D. C., Brown, M. D. & Lott, M. T. Mitochondrial DNA variation in human evolution and disease. *Gene* (1999) doi:10.1016/S0378-1119(99)00295-4.
5. Helgason, A., Sigurðardóttir, S., Gulcher, J. R., Ward, R. & Stefánsson, K. mtDNA and the origin of the Icelanders: Deciphering signals of recent population history. *Am. J. Hum. Genet.* (2000) doi:10.1086/302816.
6. Thangaraj K, Chaubey G, Kivisild T, Reddy AG, Singh VK, Rasalkar AA, Singh L. Reconstructing the origin of Andaman Islanders. *Science*. 2005 May 13;308(5724):996. doi: 10.1126/science.1109987. PMID: 15890876.
7. Benton M, Macartney-Coxson D, Eccles D, Griffiths L, Chambers G, et al. Complete Mitochondrial Genome Sequencing Reveals Novel Haplotypes in a Polynesian Population. *PLOS ONE* 2012, 7(4) e35026. <https://doi.org/10.1371/journal.pone.0035026>
8. Mistry, R. K. *Glimpses of Parsi history, Insights Into The Zarathustrian Religion*, p.20.
9. Nariman, R. F. *The Inner Fire – Faith, Choice, and Modern Day Living in Zoroastrianism*, p. 20-21
10. Anthony, DW, (2007), *The Horse, The Wheel, And Language. How Bronze-Age Riders from the Eurasian Steppes Shaped the Modern World*, Princeton University Press. p. 9.
11. Alizadeh, A. The Rise of the Highland Elamite State in Southwestern Iran. *Current. Curr Anthropol.* **51**, 353–383 (2010).
12. Shroff Z, C. M. The potential impact of intermarriage on the population decline of the Parsis of Mumbai, India. *Demogr Res.* **25**, 545–564 (2011).
13. Karkal, M. Marriage among Parsis. *Demogr. India* **4**, 128 (1975).
14. *The Vendidad: The Zoroastrian Book Of The Law* Paperback – September 10, 2010. I, 1-2 & II, 5. Charles. F. Horne. ISBN-10: 1162910089; ISBN-13: 978-1162910086. Kessinger Publishing, LLC (September 10, 2010)
15. Bennet, J. G. The Hyperborean Origin of the Indo-European Culture, *Journal Systematics. J Syst.* **1**, (1963).
16. Jussawalla, D. J., Yeole, B. B. & Natekar, M. V. Histological and epidemiological features of breast cancer in different religious groups in greater bombay. *J. Surg. Oncol.* (1981) doi:10.1002/jso.2930180309.
17. Barnabas-Sohi, N. *et al.* Breast carcinoma in a high-risk population: Structural alterations in neu, int-2, and p-53 genes. *Breast Dis.* (1993).

18. Jussawalla, D. J. The persistence of differences in cancer incidence at various anatomical sites 1300 years after immigration. *Recent Results Cancer Res.* (1975) doi:10.1007/978-3-642-80880-7\_22.
19. Jussawalla, D. J. & Jain, D. K. Lung cancer in Greater Bombay: Correlations with religion and smoking habits. *Br. J. Cancer* (1979) doi:10.1038/bjc.1979.199.
20. Andrews, R. M. *et al.* Reanalysis and revision of the Cambridge reference sequence for human mitochondrial DNA [5]. *Nature Genetics* (1999) doi:10.1038/13779.
21. Houshmand, M. *et al.* Is 8860 variation a rare polymorphism or associated as a secondary effect in HCM disease? *Arch. Med. Sci.* (2011) doi:10.5114/aoms.2011.22074.
22. Derenko, M. *et al.* Complete mitochondrial DNA diversity in Iranians. *PLoS One* (2013) doi:10.1371/journal.pone.0080673.
23. Chandrasekar, A. *et al.* Updating phylogeny of mitochondrial DNA macrohaplogroup m in India: dispersal of modern human in South Asian corridor. *PLoS One* **4**, e7447–e7447 (2009).
24. Rajkumar, R., Banerjee, J., Gunturi, H. B., Trivedi, R. & Kashyap, V. K. Phylogeny and antiquity of M macrohaplogroup inferred from complete mt DNA sequence of Indian specific lineages. *BMC Evol. Biol.* **5**, 26 (2005).
25. Sahakyan, H. *et al.* Origin and spread of human mitochondrial DNA haplogroup U7. *Sci. Rep.* **7**, 46044 (2017).
26. Chaubey, G. *et al.* ‘Like sugar in milk’: Reconstructing the genetic history of the Parsi population. *Genome Biol.* (2017) doi:10.1186/s13059-017-1244-9.
27. López, S. *et al.* The Genetic Legacy of Zoroastrianism in Iran and India: Insights into Population Structure, Gene Flow, and Selection. *Am. J. Hum. Genet.* (2017) doi:10.1016/j.ajhg.2017.07.013.
28. Brandon, M., Baldi, P. & Wallace, D. Mitochondrial mutations in cancer. *Oncogene* **25**, 4647–4662 (2006). <https://doi.org/10.1038/sj.onc.1209607>
29. Koshikawa N, Akimoto M, Hayashi JI, Nagase H, Takenaga K. Association of predicted pathogenic mutations in mitochondrial ND genes with distant metastasis in NSCLC and colon cancer. *Sci Rep.* 2017 Nov 14;7(1):15535. doi: 10.1038/s41598-017-15592-2.
30. Alexandrov LB, Ju YS, Haase K, et al. Mutational signatures associated with tobacco smoking in human cancer. *Science.* 2016;354(6312):618 - 622.
31. Menotti F, Brega A, Diegoli M, Grasso M, Modena MG, Arbustini E. A novel mtDNA point mutation in tRNA(Val) is associated with hypertrophic cardiomyopathy and MELAS. *Ital Heart J.* 2004;5(6):460-465.
32. Brandon MC, Ruiz-Pesini E, Mishmar D, et al. MITOMASTER: a bioinformatics tool for the analysis of mitochondrial DNA sequences. *Hum Mutat.* 2009;30(1):1-6. doi:10.1002/humu.20801.
33. Quintana-Murci, L. *et al.* Where west meets east: the complex mtDNA landscape of the southwest and Central Asian corridor. *Am. J. Hum. Genet.* **74**, 827–845 (2004).
34. Shamoon-Pour, M., Li, M. & Merriwether, D. A. Rare human mitochondrial HV lineages



- spread from the Near East and Caucasus during post-LGM and Neolithic expansions. *Sci. Rep.* **9**, 14751 (2019).
35. Farjadian, S. *et al.* Discordant Patterns of mtDNA and Ethno-Linguistic Variation in 14 Iranian Ethnic Groups. *Hum. Hered.* **72**, 73–84 (2011).
  36. Thangaraj, K. *et al.* In situ origin of deep rooting lineages of mitochondrial Macrohaplogroup ‘M’ in India. *BMC Genomics* **7**, 151 (2006).
  37. Bharucha NE, Bharucha EP, Bharucha AE, Bhise AV, Schoenberg BS. Prevalence of Parkinson's Disease in the Parsi Community of Bombay, India. *Arch Neurol.* 1988;45(12):1321–1323. doi:10.1001/archneur.1988.00520360039008
  38. Fang, H., Shen, L., Chen, T. *et al.* Cancer type-specific modulation of mitochondrial haplogroups in breast, colorectal and thyroid cancer. *BMC Cancer* **10**, 421 (2010).
  39. Van der Walt JM, Dementieva YA, Martin ER, Scott WK, Nicodemus KK, Kroner CC, Welsh-Bohmer KA, Saunders AM, Roses AD, Small GW, Schmechel DE, Murali Doraiswamy P, Gilbert JR, Haines JL, Vance JM, Pericak-Vance MA. Analysis of European mitochondrial haplogroups with Alzheimer disease risk. *Neurosci Lett.* 2004 Jul 15; 365(1):28-32.
  40. van Oven M, Kayser M *Hum Mutat.* Updated comprehensive phylogenetic tree of global human mitochondrial DNA variation. 2009 Feb; 30(2): E386-94.
  41. E. Ruiz-Pesini, A.C. Lapeña, C. Díez, E. Alvarez, J.A. Enríquez, M.J. López-Pérez Seminal quality correlates with mitochondrial functionality. *Clin. Chim. Acta.*, 300 (2000), p. 97 105.
  42. Balkrishna Bhika Yeole, AP Kurkure, SH Advani, Sunny Lizzy; An Assessment of Cancer Incidence Patterns in Parsi and Non Parsi Populations, Greater Mumbai. *Asian Pacific Journal of Cancer Prevention*, Vol 2, 2001; 293-298
  43. Chen JB, Yang YH, Lee WC, *et al.* Sequence-based polymorphisms in the mitochondrial D-loop and potential SNP predictors for chronic dialysis. *PLoS One.* 2012;7(7):e41125. doi:10.1371/journal.pone.0041125
  44. Zaki EA, Freilinger T, Klopstock T, *et al.* Two common mitochondrial DNA polymorphisms are highly associated with migraine headache and cyclic vomiting syndrome. *Cephalalgia.* 2009;29(7):719-728. doi:10.1111/j.1468-2982.2008.01793.x
  45. Schulmann A, Ryu E, Goncalves V, *et al.* Novel Complex Interactions between Mitochondrial and Nuclear DNA in Schizophrenia and Bipolar Disorder. *Mol Neuropsychiatry.* 2019;5(1):13 - 27. doi:10.1159/000495658
  46. August E Woerner, Jennifer Churchill Cihlar, Utpal Smart, Bruce Budowle, Numt identification and removal with RtN!, *Bioinformatics*, btaa642, <https://doi.org/10.1093/bioinformatics/btaa642>
  47. Sobenin IA, Mitrofanov KY, Zhelankin AV, *et al.* Quantitative assessment of heteroplasmy of mitochondrial genome: perspectives in diagnostics and methodological pitfalls. *Biomed Res Int.* 2014;2014:292017. doi:10.1155/2014/292017
  48. Edgar, R. C. MUSCLE: multiple sequence alignment with high accuracy and high

- throughput. *Nucleic Acids Res.* 32, 1792–1797 (2004).
49. Kumar, S., Stecher, G., Li, M., Knyaz, C. & Tamura, K. MEGA X: Molecular Evolutionary Genetics Analysis across Computing Platforms. *Mol. Biol. Evol.* 35, 1547–1549 (2018).
  50. Tamura, K., Nei, M. & Kumar, S. Prospects for inferring very large phylogenies by using the neighbor-joining method. *Proc. Natl. Acad. Sci. U. S. A.* **101**, 11030–11035 (2004).
  51. Niroula A, Vihinen M. PON-mt-tRNA: a multifactorial probability-based method for classification of mitochondrial tRNA variations. *Nucleic Acids Res.* 2016;44(5):2020-2027. doi:10.1093/nar/gkw046

## Figure Legends

**Figure 1A : Identification of 28 variants in the de novo Parsi mitochondrial genome, AGENOME-ZPMS-HV2a-1**

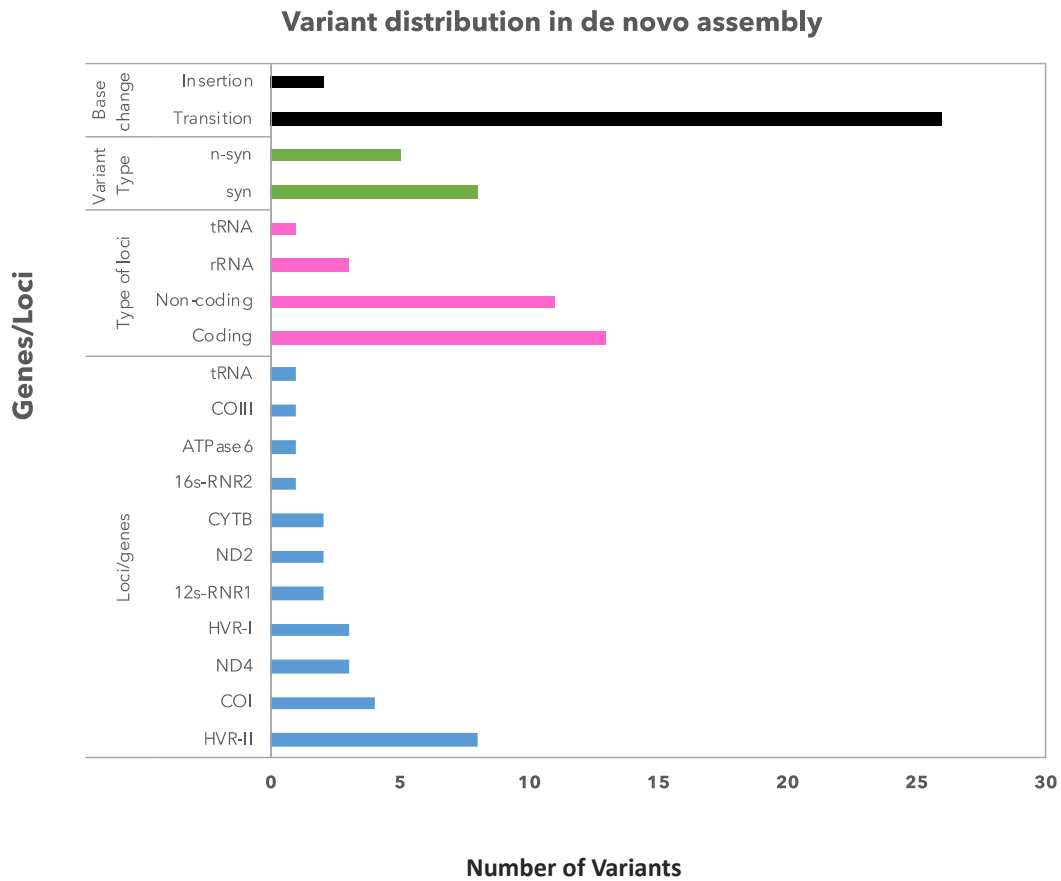

**Figure 1B: Annotation of 28 variants in the AGENOME-ZPMS-HV2a-1**

|                           |        |       |       |       |       |       |       |       |               |       |               |       |       |       |       |       |       |  |
|---------------------------|--------|-------|-------|-------|-------|-------|-------|-------|---------------|-------|---------------|-------|-------|-------|-------|-------|-------|--|
| Reference_position        | 72     | 73    | 152   | 195   | 263   | 309.1 | 309.2 | 310   | 750           | 1438  | 2706          | 4769  | 5075  | 6104  | 6179  | 7028  | 7193  |  |
| Reference_base            | T      | A     | T     | T     | A     | .     | .     | T     | A             | A     | A             | A     | T     | C     | G     | C     | T     |  |
| AGENOME-ZPMS-HV2a-1       | C      | G     | C     | C     | G     | C     | T     | C     | G             | G     | G             | G     | C     | T     | A     | T     | C     |  |
| Mitochondrial genome loci | HVR-II |       |       |       |       |       |       |       | 12S-rRNA:RNR1 |       | 16S-rRNA:RNR2 |       | ND2   |       | COI   |       |       |  |
| Amino Acid change         | nc     | nc    | nc    | nc    | nc    | nc    | nc    | nc    | rRNA          | rRNA  | rRNA          | M100M | I202I | F67F  | M92M  | A375A | F430F |  |
| Conservation index        |        |       |       |       |       |       |       |       | 98%           | 87%   | 84%           | 24%   | 44%   | 100%  | 100%  | 100%  | 100%  |  |
| Protein Position          |        |       |       |       |       |       |       |       |               |       |               | 100   | 202   | 67    | 92    | 375   | 430   |  |
| Variant Type              |        |       |       |       |       |       |       |       |               |       |               | syn   | syn   | syn   | syn   | syn   | syn   |  |
| Type of base change       | trans  | trans | trans | trans | trans | ins   | ins   | trans | trans         | trans | trans         | trans | trans | trans | trans | trans | trans |  |

|                           |         |       |          |       |       |       |       |       |       |       |       |            |
|---------------------------|---------|-------|----------|-------|-------|-------|-------|-------|-------|-------|-------|------------|
| Reference_position        | 8860    | 9336  | 10410    | 11016 | 11935 | 12061 | 15326 | 15792 | 16153 | 16217 | 16309 | Haplogroup |
| Reference_base            | A       | A     | T        | G     | T     | C     | A     | T     | G     | T     | A     |            |
| ZPMS-HV-1                 | G       | G     | C        | A     | C     | T     | G     | C     | A     | C     | G     | HV2a       |
| Mitochondrial genome loci | ATPase6 | COIII | tRNA [R] | ND-4  |       |       | CYTB  |       | HVR-I |       |       |            |
| Amino Acid change         | T112A   | M44V  | tRNA     | S86N  | T392T | N434N | T194A | I349T | nc    | nc    | nc    |            |
| Conservation index        | 71%     | 16%   | 22%      | 7%    | 89%   | 69%   | 18%   | 58%   |       |       |       |            |
| Protein Position          | 112     | 44    |          | 86    | 392   | 434   | 194   | 349   |       |       |       |            |
| Variant Type              | n-syn   | n-syn |          | n-syn | syn   | syn   | n-syn | n-syn |       |       |       |            |
| Type of base change       | trans   | trans | trans    | trans | trans | trans | trans | trans | trans | trans | trans |            |

**Figure 1 | Characterization of 28 variants identified in the *de novo* Parsi mitochondrial reference genome (AGENOME-ZPMS-HV2a-1). A, Classification and distribution of the variants. B, Annotation of the variants in relation to the revised Cambridge Reference Sequence (rCRS).**

**Figure 2A : Representation of Males and Females in the 100 Zoroastrian-Parsi whole mitogenome study**

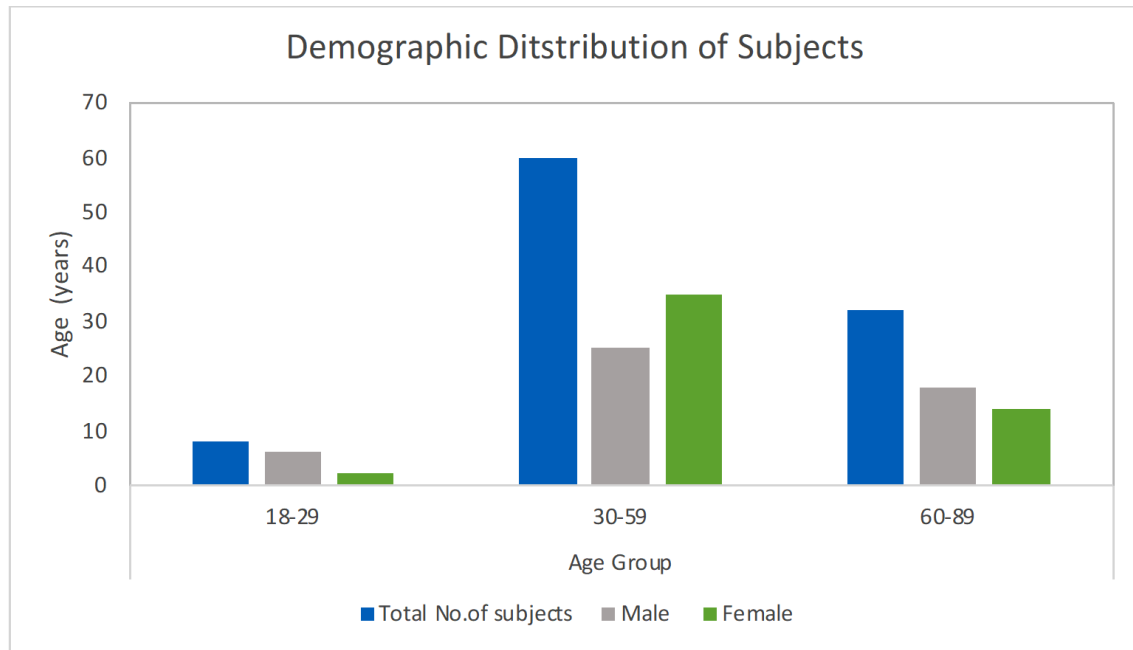

## Figure 2B : Distribution of 420 variants across gene loci in the 100 Zoroastrian-Parsi whole mitogenomes

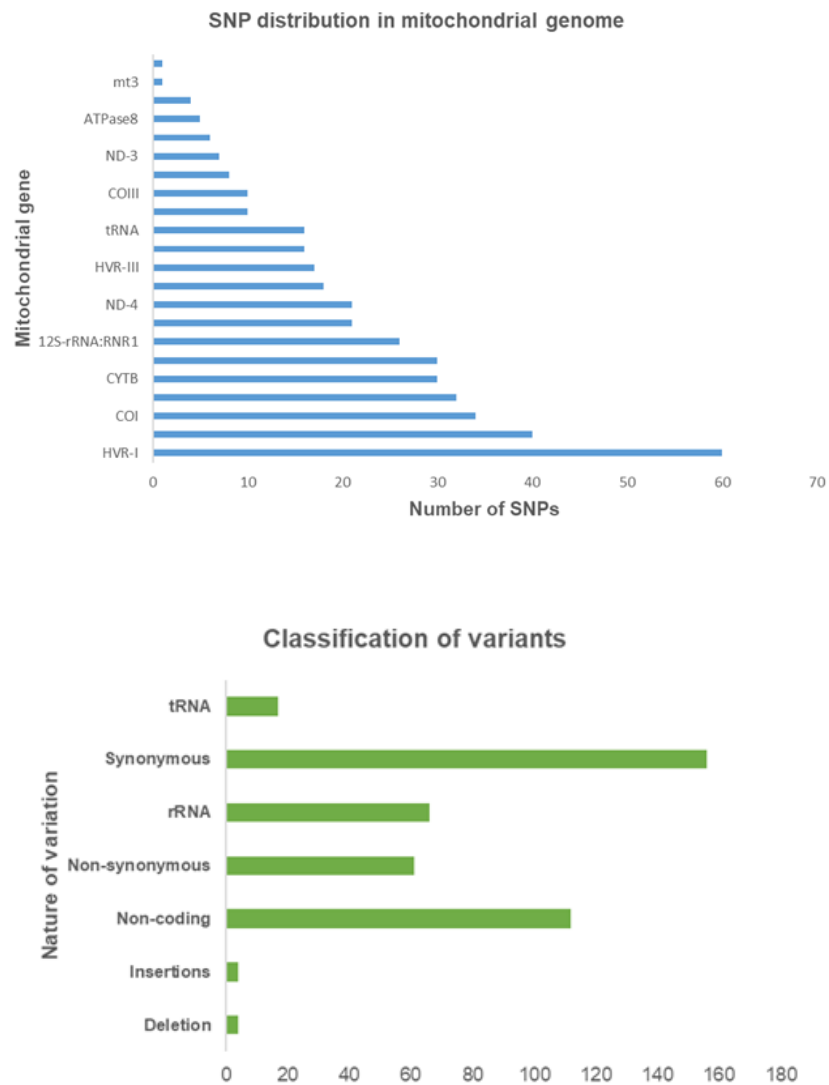

**Figure 2 | Characterization of the 100 study participants and the variants identified in their mitochondrial genomes. A,** Demographic distribution of the 100 Zoroastrian-Parsi subjects in this study. **B,** (upper) Distribution of the 420 SNPs identified in the genes of the 100 mitochondrial genomes; (lower) classification of the 420 variants identified in the 100 mitochondrial genomes.



## Table 1 : Identification of 25 sub-haplogroups in the 100 Zoroastrian-Parsi study group

Table: Haplogroup and Haplotype count in Parsis

| Major haplogroup | Sub-haplotypes | Number of Parsis |
|------------------|----------------|------------------|
| HV               | HV2a           | 14               |
|                  | HV12b          | 1                |
| U                | U7a            | 6                |
|                  | U2e            | 3                |
|                  | U4b            | 11               |
|                  | U1a            | 1                |
| T                | T1a            | 2                |
|                  | T2g            | 1                |
|                  | T2l            | 1                |
|                  | T2b            | 1                |
| M                | M5a            | 2                |
|                  | M39b           | 9                |
|                  | M33a           | 1                |
|                  | M52b           | 9                |
|                  | M24a           | 8                |
|                  | M3a            | 8                |
|                  | M30d           | 11               |
|                  | M2a            | 2                |
|                  | M4a            | 1                |
|                  | M2b            | 1                |
|                  | M35b           | 1                |
|                  | M27b           | 1                |
| A                | A2v            | 3                |
| F                | F1g            | 1                |
| Z                | Z1a            | 1                |

Table 1 | Distribution of the 100 Parsi subjects across 7 major haplogroups and 25 sub-haplogroups.

### Figure 3 : Lack of haplogroup diversity in the Parsi cohort suggesting endogamy

A

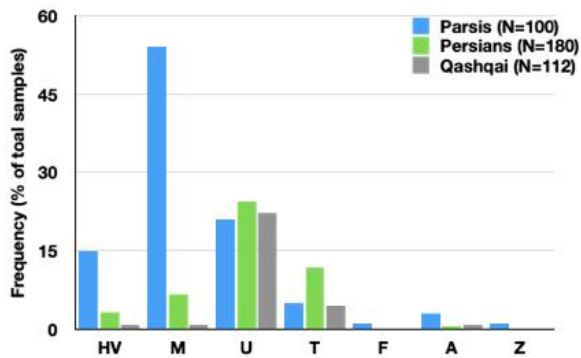

B

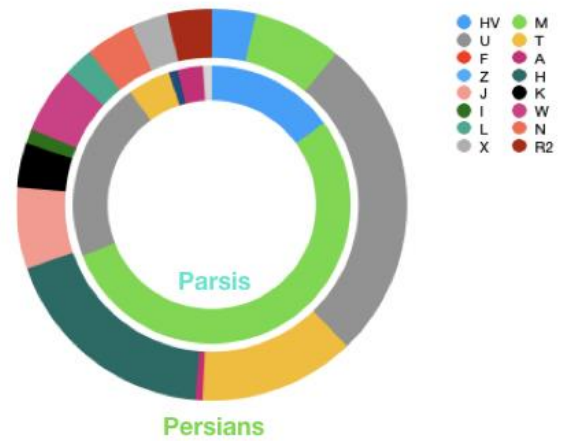

Figure 3 | A lack of haplogroup diversity in the Parsi cohort is consistent with endogamy. **A**, Distribution of the seven major haplogroups identified in the Parsi cohort for Parsis, Persians, and Qashqais. **B**, Distribution of all the major haplogroups identified in either the Parsi or Persian cohorts.

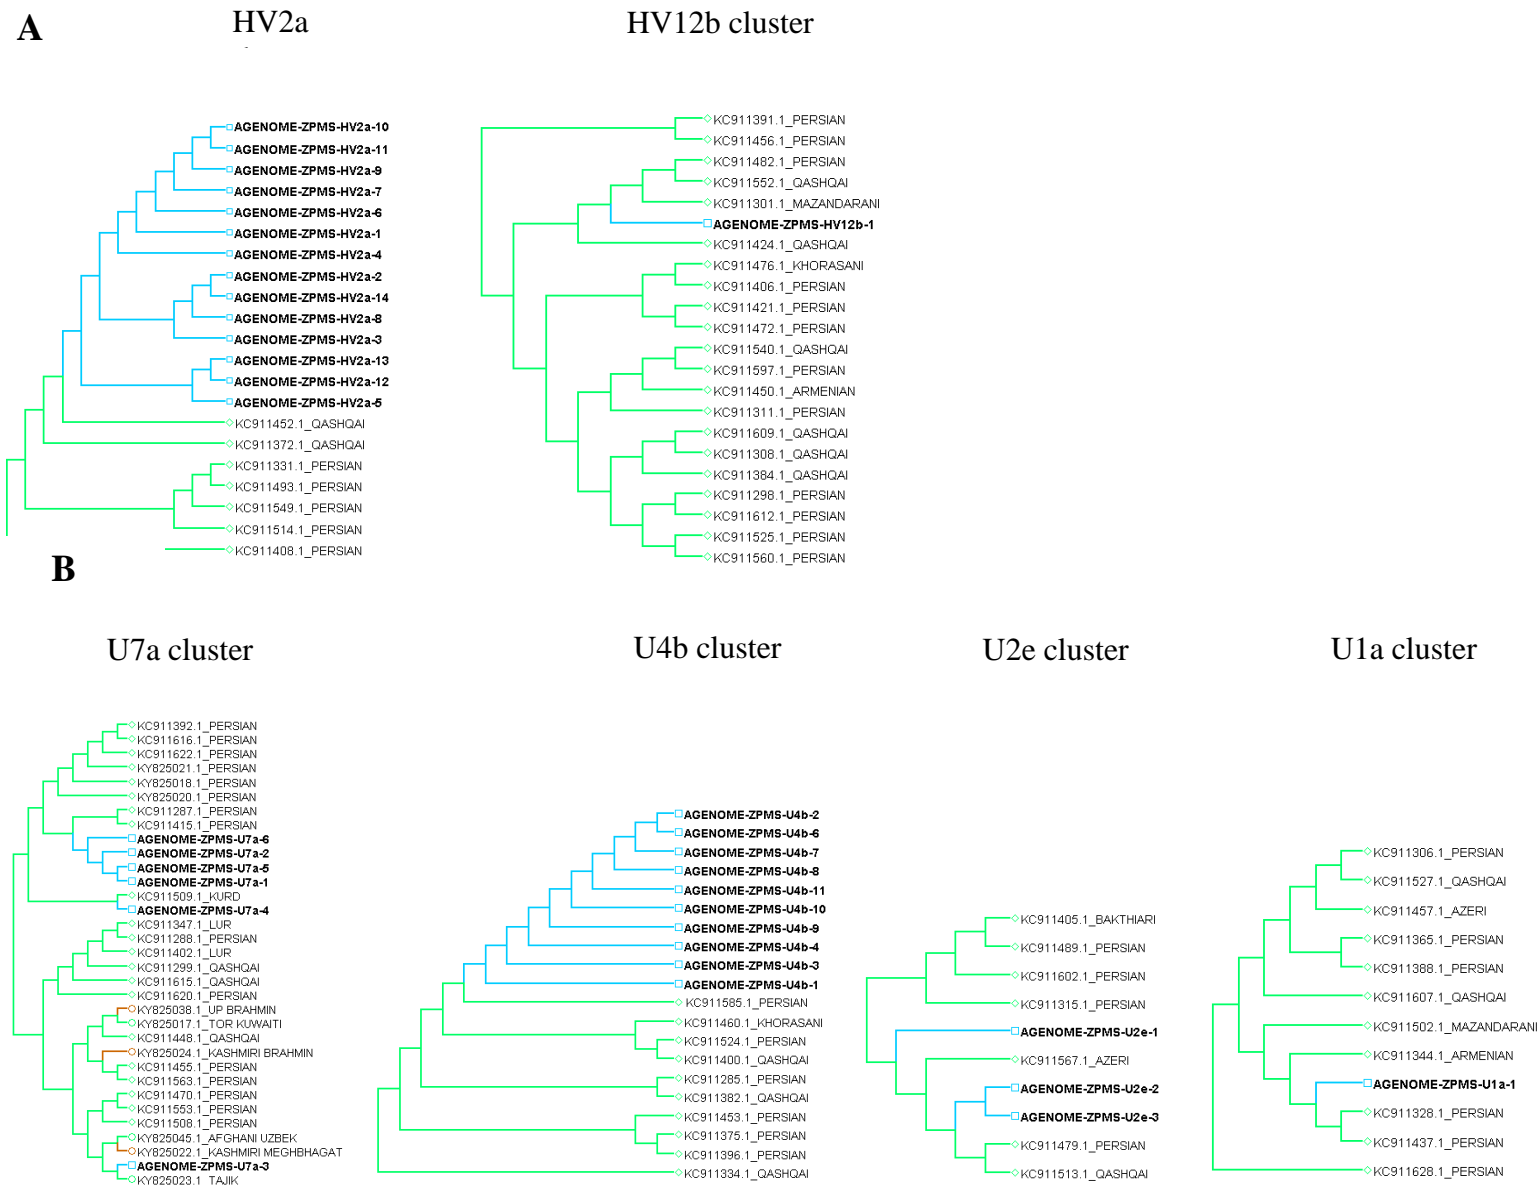

**Figure 4A, B: Phylogenetic analysis depicting individual sub-haplogroup clusters of 97 Parsis, 352 Iranian and 100 relic tribes of Indian origin (A) Representative cladograms of the HV sub-haplogroup (B) Representative cladograms of the U sub-haplogroup**

C

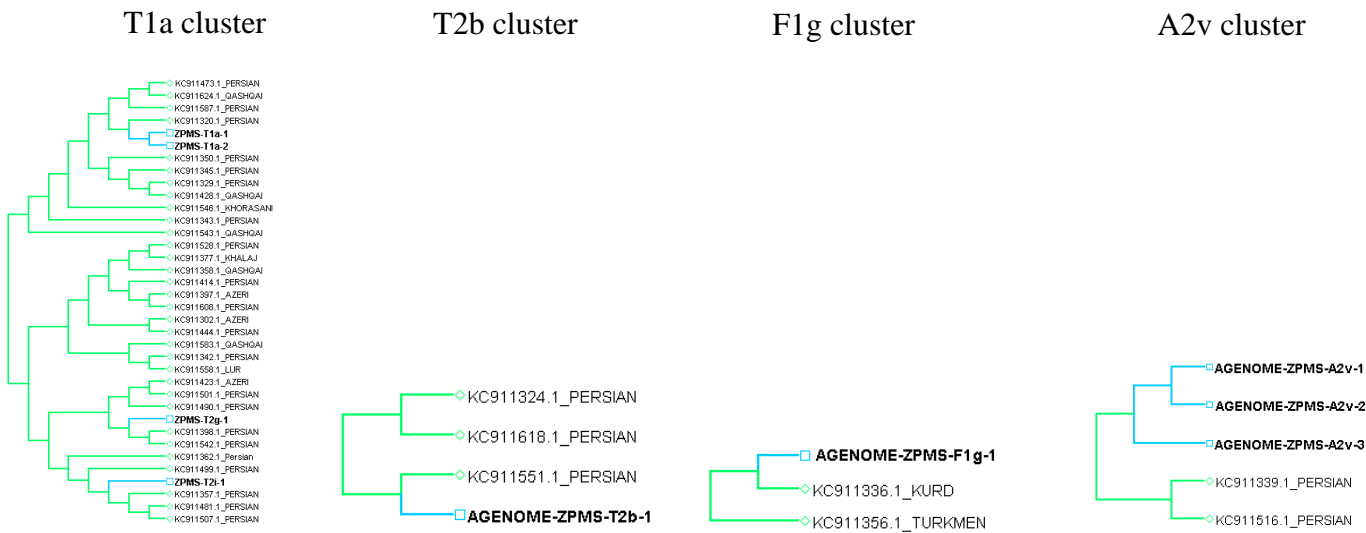

**Figure 4C: Phylogenetic analysis depicting individual sub-haplogroup clusters of 97 Parsis, 352 Iranian and 100 relic tribes of Indian origin (C) Representative cladograms of the T, F and A sub-haplogroup**

D

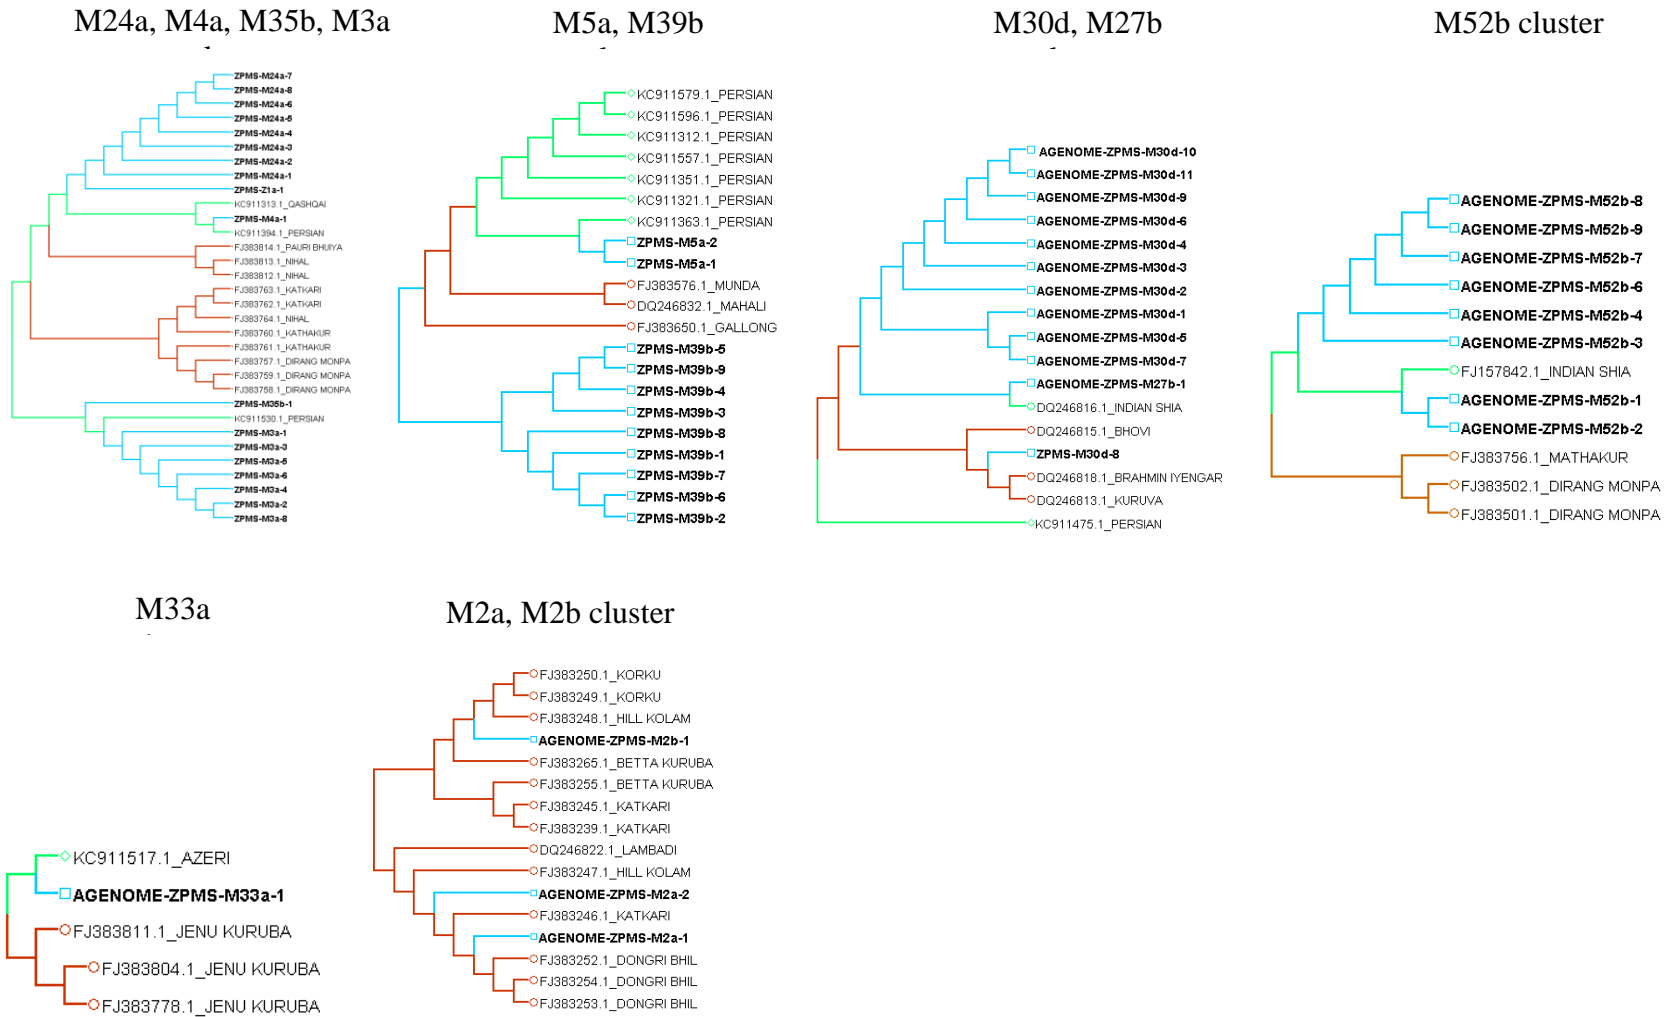

**Figure 4D: Phylogenetic analysis depicting individual sub-haplogroup clusters of 97 Parsis, 352 Iranian and 100 relic tribes of Indian origin (A-D) Representative cladograms of the each sub-haplogroup**

## E

| Phylogeny analysis          |               | Phylogenetic clustering of HV sub-haplogroup                                               |                            |                            |
|-----------------------------|---------------|--------------------------------------------------------------------------------------------|----------------------------|----------------------------|
| Population                  | Parsi samples | Ethnic Groups (352 Iranian mitogenomes, Derenko et al.) clustering with HV haplogroup from | HV2a (n=14, current study) | HV12b (n=1, current study) |
| Iranians and Iranian origin | 74            | Persian                                                                                    | 5                          | 12                         |
| Relic tribes                | 4             | Qashqai                                                                                    | 2                          | 6                          |
| Distinct cluster            | 19            | Lur                                                                                        | 0                          | 0                          |
|                             |               | Mazandarani                                                                                | 0                          | 1                          |
|                             |               | Armenian                                                                                   | 0                          | 0                          |
|                             |               | Kurd                                                                                       | 0                          | 1                          |
|                             |               | Khorasani                                                                                  | 0                          | 1                          |
|                             |               | Azeri                                                                                      | 0                          | 0                          |
|                             |               | Bakthiari                                                                                  | 0                          | 0                          |
|                             |               | Khalaj                                                                                     | 0                          | 0                          |

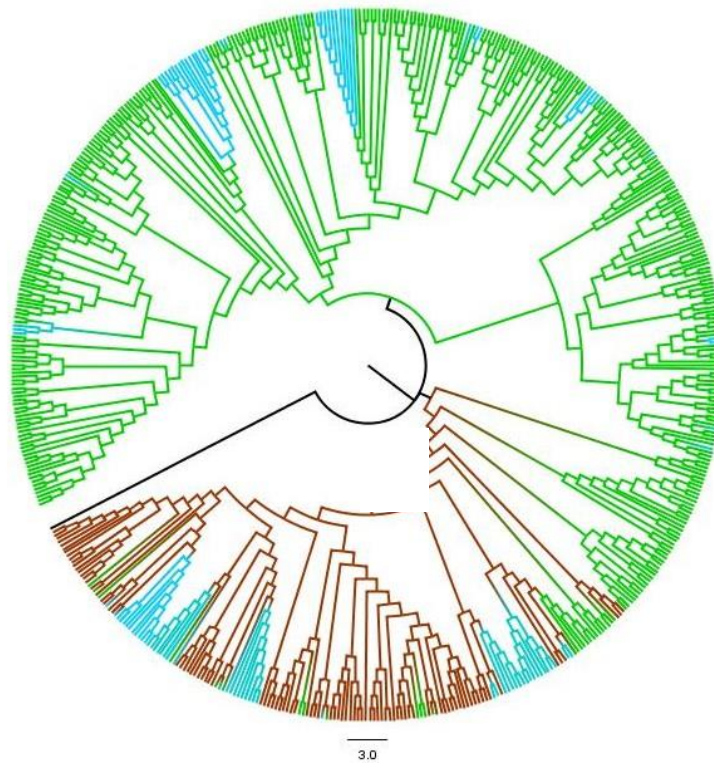

**Figure 4 | Comparative phylogenetic analysis of individual sub-haplogroup clusters for 97 Parsis, 352 Iranians, and 100 individuals from relic tribes of Indian origin. A, HV sub-haplogroup. B, U sub-haplogroup. C, T, F, and A sub-haplogroups. D, M sub-haplogroup.** Figure 4A-D represent the zoomed in version of the clustering represented in the complete circular representation in Figure 4E. **E**, Parsi clustering with Iranians, relic tribes of Indian origin, or forming a unique cluster (Table, top left). Results of clustering of the HV2 Parsis with other ethnic groups in the Iranian mitogenome (Table, top right).



Whole-mitochondrial genome clustering of Parsis (blue), Iranians (green), and Indians (brown). The outgroup is indicated by the black line

**Figure 5A: PCA analysis shows absence of Longevity variants in U1a and HV12bsub-haplogroups**

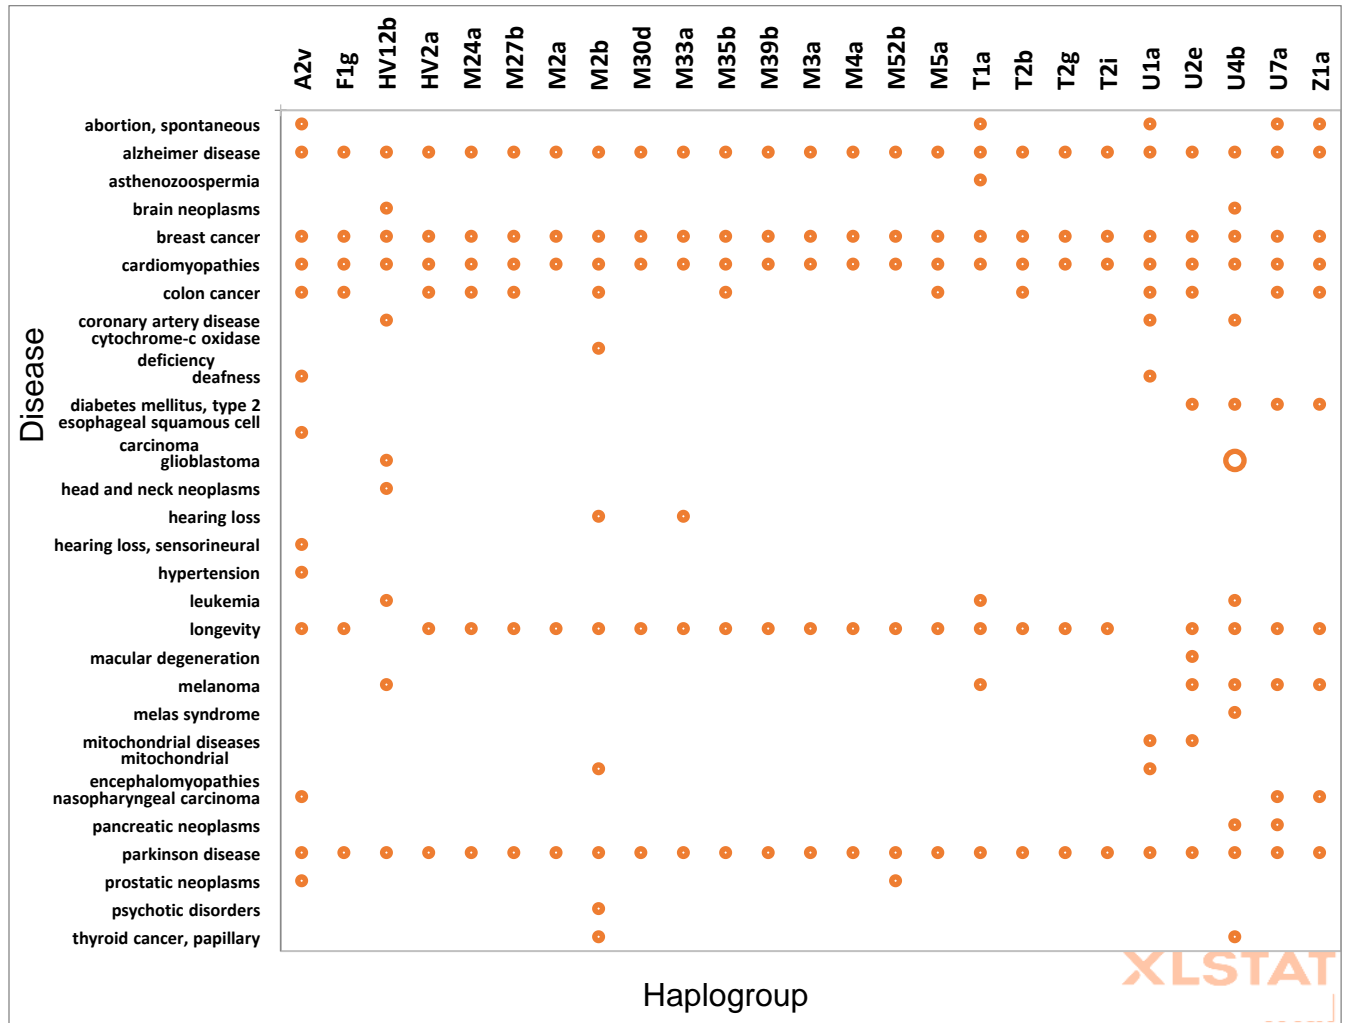

**Figure 5B: Lack of smoking induced mutational signatures in the Parsi cohort**

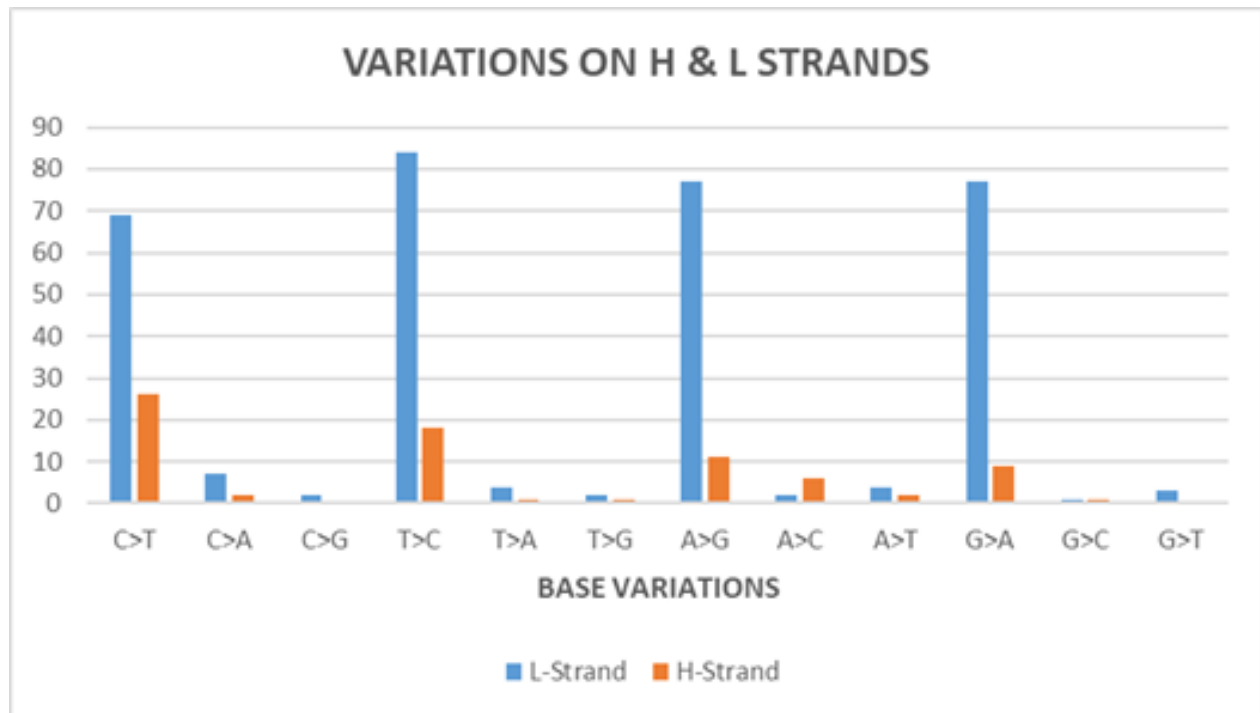

**Figure 5 | Haplogroup specific disease associations and smoking-related mutational signatures for the 100 Parsi mitochondrial genomes in this study.** **A**, Principal component analysis of disease associations with sub-haplogroups. The U1a and F1g sub-haplogroups show an absence of longevity-related disease associations. **B**, Transitions and transversions on the heavy (H) and light (L) strands for the 100 Parsi mitochondrial genomes in this study.

**Figure 6A: CYTB gene has the highest occurrence of non-synonymous variants in this study**

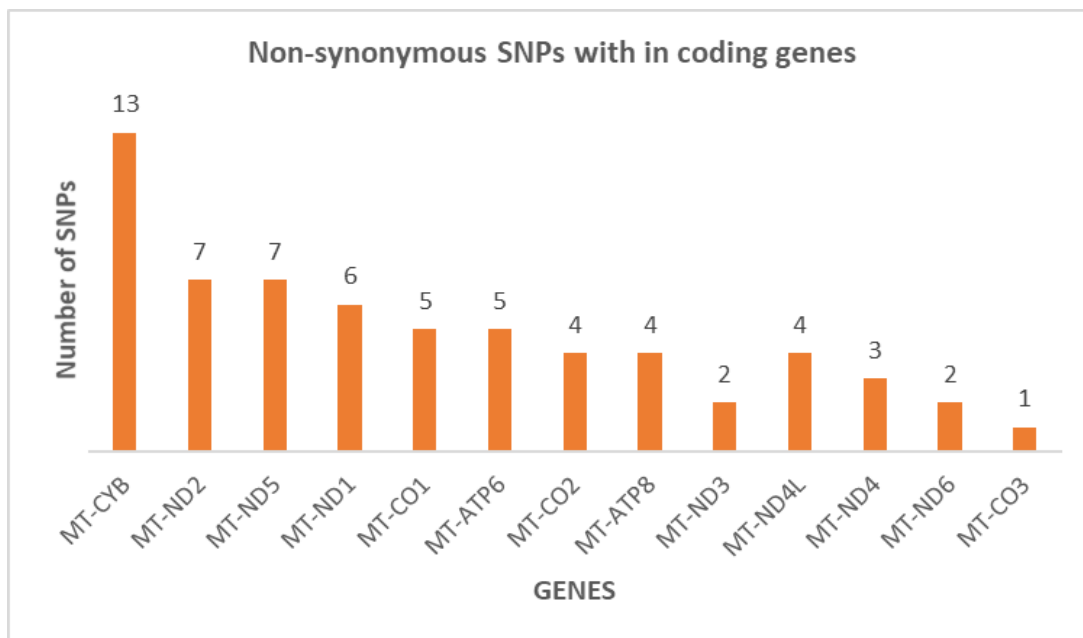

| Gene_symbol | Count |
|-------------|-------|
| MT-CYB      | 13    |
| MT-ND2      | 7     |
| MT-ND5      | 7     |
| MT-ND1      | 6     |
| MT-CO1      | 5     |
| MT-ATP6     | 5     |
| MT-CO2      | 4     |
| MT-ATP8     | 4     |
| MT-ND3      | 2     |
| MT-ND4L     | 4     |
| MT-ND4      | 3     |
| MT-ND6      | 2     |
| MT-CO3      | 1     |

## Figure 6B: Gene ontology associated with non-synonymous variants among 420 variants

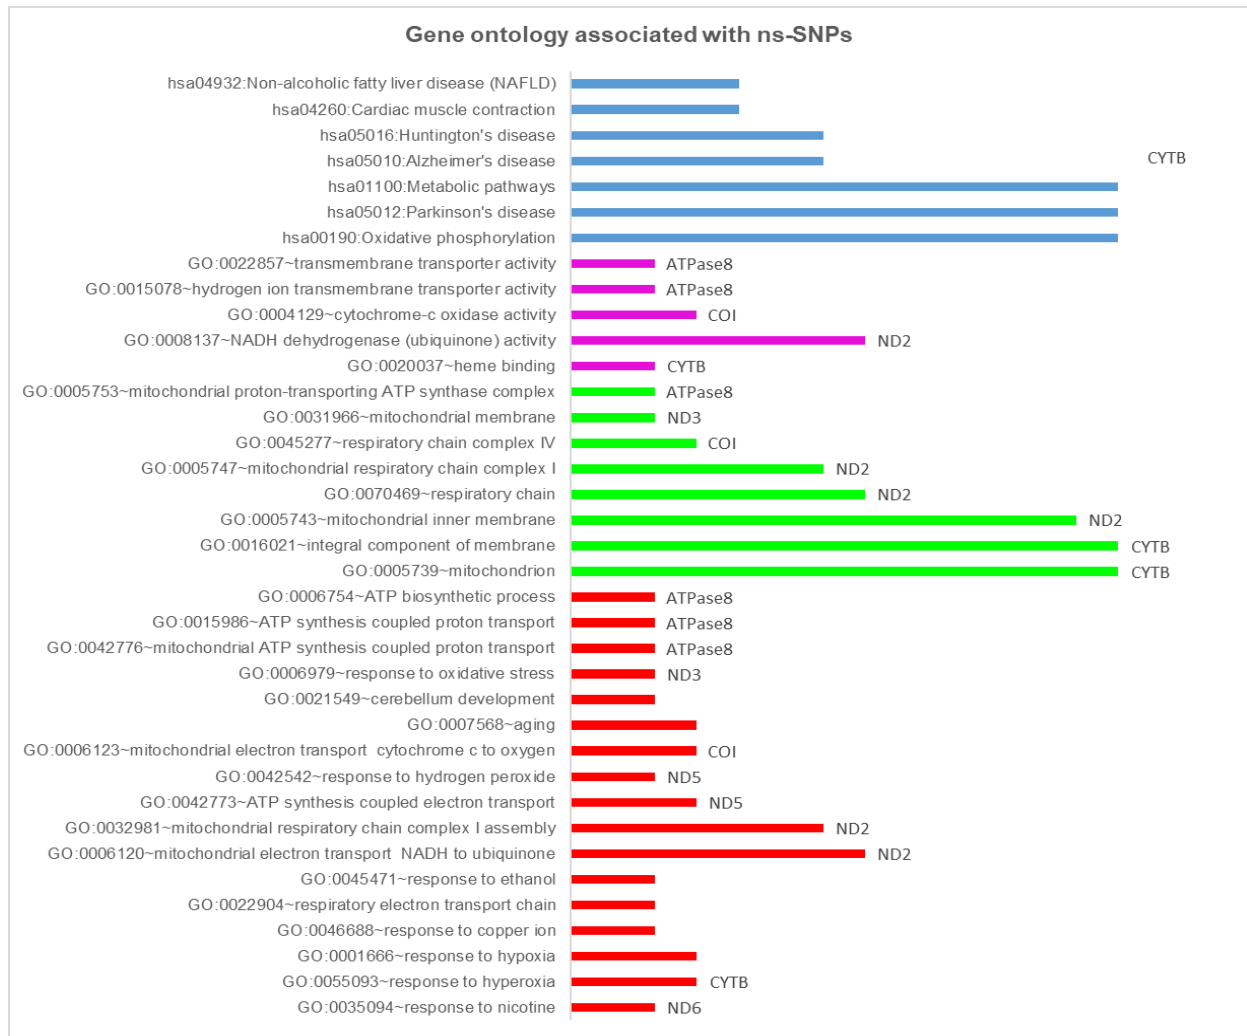

**Figure 6 | Analysis of the nonsynonymous variants in the 420 variants in the 100 Parsi mitochondrial genome sequences. A,** Occurrence of the nonsynonymous variants within coding gene loci of the mitochondrial genome, as analyzed with the MitImpact database. Note that the *CYTB* gene has the highest occurrence. **B,** Gene ontology analysis of the nonsynonymous variants using the DAVID and UNITPROT annotation tools.

## Figure 7: 12 unique variants found in the current study

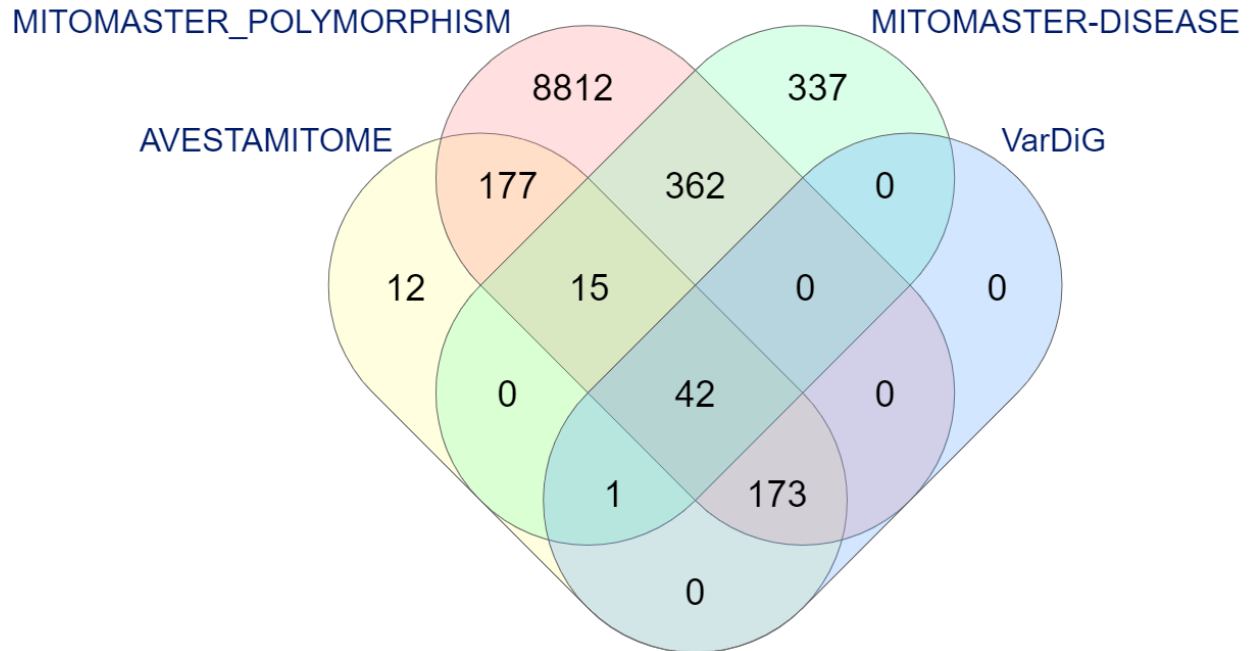

**Figure 7 | Comparative analysis of the 420 variants in the AVESTAMITOME™ Zoroastrian-Parsi community dataset with common and disease-associated polymorphisms in the MITOMASTER database and the VarDiG-R search engine. Twelve unique variants were found in the current study.**

## Supplementary Figures and Tables

| Sample Name                    | Total Data (bp)        | Mapped data to Mito_Genome (bp) | X coverage |
|--------------------------------|------------------------|---------------------------------|------------|
| AGENOME-ZPMS-HV2a-1 (Nanopore) | 24620822729 (24.6 Gb)  | 23156357 (23mb)                 | 1447.27    |
| AGENOME-ZPMS-HV2a-1 (Nanopore) | 15157201611 (15.15 Gb) | 7718168 (7.7 mb)                | 482.38     |

| Sample Name                    | Total (Reads) | Total data in GB | Mitochondrial Reads in data | Mitochondrial coverage (mb) | X coverage |
|--------------------------------|---------------|------------------|-----------------------------|-----------------------------|------------|
| AGENOME-ZPMS-HV2a-1 (Illumina) | 320987263     | 96.24            | 229095                      | 6.8                         | 4295       |

**Supplementary Figure 1:** QC data of the *de novo* Zoroastrian Parsi Mitochondrial Reference Genome (AGENOME-ZPMRG-HV2a-1)

## Figure 2 : Validation of variants in the AGENOME-ZPMS-HV2a-1 by Sanger sequencing

|                        |                                                                         |       |
|------------------------|-------------------------------------------------------------------------|-------|
| 1. rCRS                | CCTGACTGGCATTGTATTAGCAAACCTCATCACTAGACATCGTACTACACGACACGCTACTA          | 7018  |
| 2. AGENOME-ZPMS-HV2a-1 | CCTGACTGGCATTGTATTAGCAAACCTCATCACTAGACATCGTACTACACGACACGCTACTA          | 7018  |
| 3. SANGER-SEQUENCED    | CCTGACTGGCATTGTATTAGCAAACCTCATCACTAGACATCGTACTACACGACACGCTACTA<br>***** | 434   |
| 1. rCRS                | CGTTGTAGCCCACTTCCACTATGTCTTATCAATAGGAGCTGTATTTGCCATCATAGGAGG            | 7078  |
| 2. AGENOME-ZPMS-HV2a-1 | CGTTGTAGCTCACTTCCACTATGTCTTATCAATAGGAGCTGTATTTGCCATCATAGGAGG            | 7078  |
| 3. SANGER-SEQUENCED    | CGTTGTAGCTCACTTCCACTATGTCTTATCAATAGGAGCTGTATTTGCCATCATAGGAGG<br>*****   | 494   |
| 1. rCRS                | CAACCGCTATGTATTTCCGTACATTACTGCCAGCCACCATGAATATTGTACGGTACCATAA           | 16138 |
| 2. AGENOME-ZPMS-HV2a-1 | CAACCGCTATGTATTTCCGTACATTACTGCCAGCCACCATGAATATTGTACGGTACCATAA           | 16138 |
| 3. SANGER-SEQUENCED    | CAACCGCTATGTATTTCCGTACATTACTGCCAGCCACCATGAATATTGTACGGTACCATAA<br>*****  | 126   |
| 1. rCRS                | ATACTTGACCACCTATAGTACATAAAAAACCAATCCACATCAAAAACCCCTCCCCATGCT            | 16198 |
| 2. AGENOME-ZPMS-HV2a-1 | ATACTTGACCACCTATAGTACATAAAAAACCAATCCACATCAAAAACCCCTCCCCATGCT            | 16198 |
| 3. SANGER-SEQUENCED    | ATACTTGACCACCTATAGTACATAAAAAACCAATCCACATCAAAAACCCCTCCCCATGCT<br>*****   | 186   |
| 1. rCRS                | TACAAGCAAGTACAGCAATCLACCCCTCAACTATCACACATCAACTGCAACTCCAAAGCCA           | 16258 |
| 2. AGENOME-ZPMS-HV2a-1 | TACAAGCAAGTACAGCAATCLACCCCTCAACTATCACACATCAACTGCAACTCCAAAGCCA           | 16258 |
| 3. SANGER-SEQUENCED    | TACAAGCAAGTACAGCAATCLACCCCTCAACTATCACACATCAACTGCAACTCCAAAGCCA<br>*****  | 246   |
| 1. rCRS                | CCCCTCACCCTAGGATACCAACAAACCTACCCACCCTTAACAGTACATGCTACATAAA              | 16318 |
| 2. AGENOME-ZPMS-HV2a-1 | CCCCTCACCCTAGGATACCAACAAACCTACCCACCCTTAACAGTACATGCTACATAAA              | 16318 |
| 3. SANGER-SEQUENCED    | CCCCTCACCCTAGGATACCAACAAACCTACCCACCCTTAACAGTACATGCTACATAAA<br>*****     | 306   |
|                        | GCCATTTACCGTACATAGCACATTACAGTCAAAATCCCTTCTCGTCCCCATGGATGACCCC           | 16378 |
|                        | GCCATTTACCGTACATAGCACATTACAGTCAAAATCCCTTCTCGTCCCCATGGATGACCCC           | 16378 |
|                        | GCCATTTACCGTACATAGCACATTACAGTCAAAATCCCTTCTCGTCCCCATGGATGACCCC<br>*****  | 366   |



|                        |                                                                        |      |
|------------------------|------------------------------------------------------------------------|------|
| 1. SANGER-SEQUENCED    | CAGGACATCCCGATGGTGCAGCCGCTATTAAGGTTTCGTTTGTTC AACGATTAAGTCCT           | 181  |
| 2. AGENOME-ZPMS-HV2a-1 | CAGGACATCCCGATGGTGCAGCCGCTATTAAGGTTTCGTTTGTTC AACGATTAAGTCCT           | 3060 |
| 3. rCRS                | CAGGACATCCCGATGGTGCAGCCGCTATTAAGGTTTCGTTTGTTC AACGATTAAGTCCT<br>*****  | 3058 |
| 1. SANGER-SEQUENCED    | ACGTGATCTGAGTT CAGACCCGAGTAATCCAGGTCGGTTTCTATCTAC-TTCAAATTCCT          | 240  |
| 2. AGENOME-ZPMS-HV2a-1 | ACGTGATCTGAGTT CAGACCCGAGTAATCCAGGTCGGTTTCTATCTAC-TTCAAATTCCT          | 3119 |
| 3. rCRS                | ACGTGATCTGAGTT CAGACCCGAGTAATCCAGGTCGGTTTCTATCTACNTTCAAATTCCT<br>***** | 3118 |
| 1. SANGER-SEQUENCED    | CCCTGTACGAAAGGACAAGAGAAATAAGGCCACTTCACAAGCGCCTTCCCCGTA AAT             | 300  |
| 2. AGENOME-ZPMS-HV2a-1 | CCCTGTACGAAAGGACAAGAGAAATAAGGCCACTTCACAAGCGCCTTCCCCGTA AAT             | 3179 |
| 3. rCRS                | CCCTGTACGAAAGGACAAGAGAAATAAGGCCACTTCACAAGCGCCTTCCCCGTA AAT<br>*****    | 3178 |
| 1. SANGER-SEQUENCED    | GATATCATCTCAACTTAGTATTATACCCACACCCACCCAAGAACAGGGTTTGTTAAGATG           | 360  |
| 2. AGENOME-ZPMS-HV2a-1 | GATATCATCTCAACTTAGTATTATACCCACACCCACCCAAGAACAGGGTTTGTTAAGATG           | 3239 |
| 3. rCRS                | GATATCATCTCAACTTAGTATTATACCCACACCCACCCAAGAACAGGGTTTGTTAAGATG<br>*****  | 3238 |
| 1. SANGER-SEQUENCED    | -----CCCCA                                                             | 5    |
| 2. AGENOME-ZPMS-HV2a-1 | ACAATTGAATGTCTGCACAGCCGCTTTCACACAGACATCATAACAAAAAATTTCCACCA            | 300  |
| 3. rCRS                | ACAATTGAATGTCTGCACAGCCACTTTCACACAGACATCATAACAAAAAATTTCCACCA<br>* **    | 300  |
| 1. SANGER-SEQUENCED    | AACCCCCCTCCTCCCGCTTCTGGCCACAGCACTTAAACACATCTCTGCCAAACCCCAA             | 65   |
| 2. AGENOME-ZPMS-HV2a-1 | AACCCCCCTCCTCCCGCTTCTGGCCACAGCACTTAAACACATCTCTGCCAAACCCCAA             | 360  |
| 3. rCRS                | AACCCCC--CTCCCGCTTCTGGCCACAGCACTTAAACACATCTCTGCCAAACCCCAA<br>*****     | 358  |
| 1. SANGER-SEQUENCED    | AAACAAGAACCCTAACACCAGCCTAACAGATTCAAATTTATCTTTGGCGGTAGCACT              | 125  |
| 2. AGENOME-ZPMS-HV2a-1 | AAACAAGAACCCTAACACCAGCCTAACAGATT-----                                  | 395  |
| 3. rCRS                | AAACAAGAACCCTAACACCAGCCTAACAGATT-----<br>*****                         | 393  |

**Supplementary Figure 2: Confirmation of variants identified with next-generation sequencing (NGS) data and confirmation by Sanger sequencing.** Sequences obtained from desired regions were analyzed for presence of variants/Variants. Low quality bases were trimmed from both ends of the sequences and used for alignment with the reference Mitochondrial Genome (rCRS). A total of 13 variants/Variants from D-loop and internal region of mitochondrial genome were verified.

## Supplementary Figure 3: QC analysis of 100 Zoroastrian-Parsi mitochondrial genome sequences

A

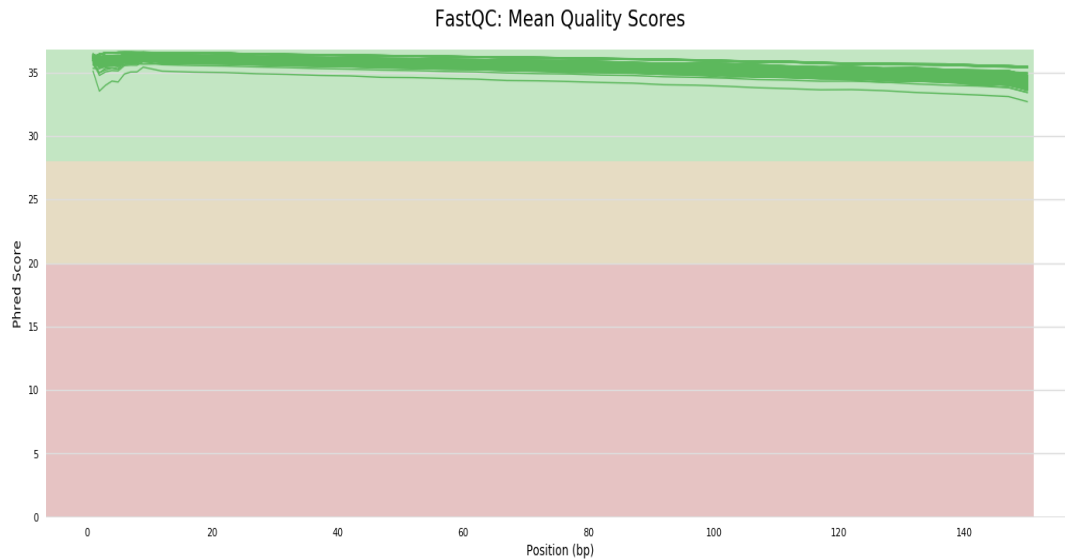

B

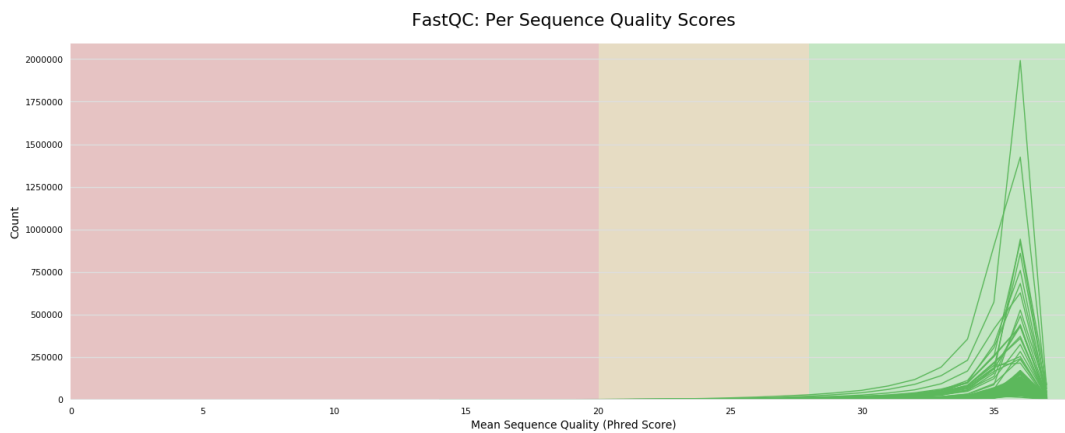

**Supplementary Figure 3:** QC analysis of 100 Parsi mitochondrial genomes (A) Frequency of mean PHRED score per read (150 read length) for 100 mitochondrial sample (B) Frequency of mean PHRED score per sequence for 100 mitochondrial samples

## Supplementary Figure 4: Distribution of 420 variants across coding genes normalized for gene length

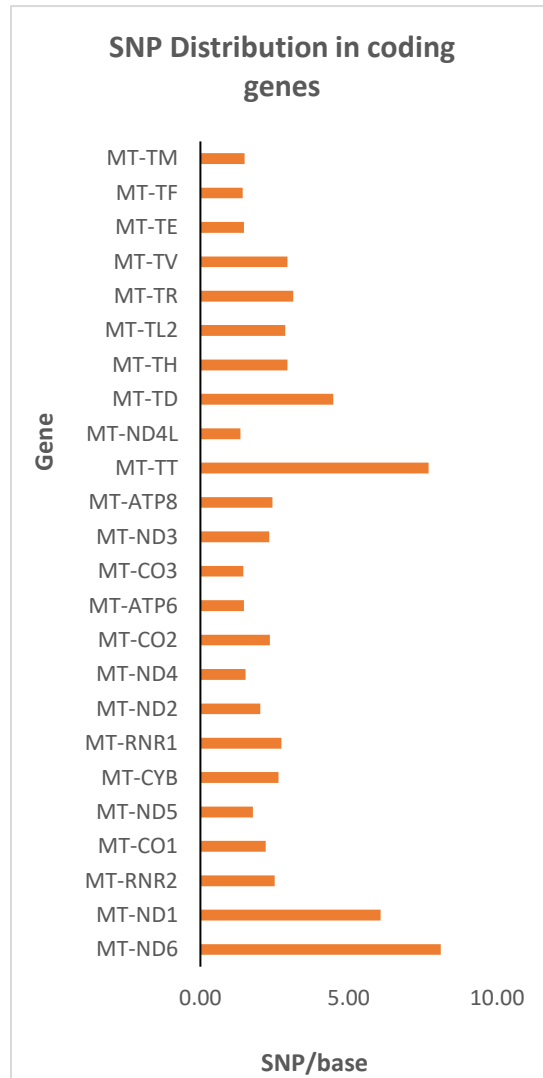

**Supplementary Figure 4:** Distribution of 420 variants across coding genes normalized to gene length (variants/gene length (in kb))

## Supplementary Figure 5 : Distribution of variants across haplogroups and demographic classification of the 100 Parsi study group

A

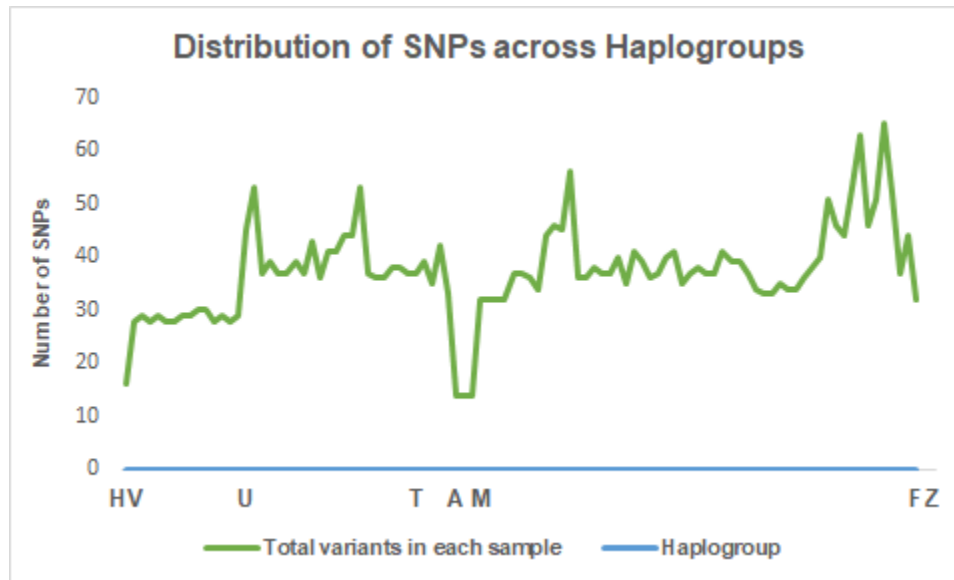

B

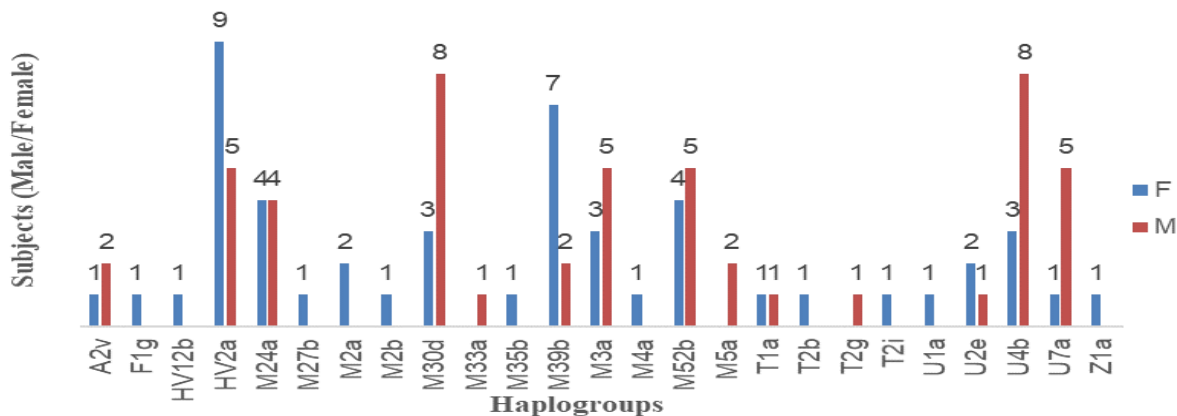

**Supplementary Figure 5: Distribution across the 100 Zoroastrian-Parsi subjects.** (A) Representative graph depicting the distribution of SNP's count across the 7 major haplogroups (B) Graph depicts the distribution of the subjects classified based on gender across 25 sub-haplogroups

## Supplementary Figure 6: Sub-haplogroup specific breakdown of 420 variants

The sub-haplogroup HV12b (n=1 subject) contained 17 Variants. HVR II harbors four Variants, while the coding genes together contain six Variants that encode three synonymous and three nonsynonymous substitutions. No Variants were observed in the genes coding for tRNAs in the HV12b sub-haplogroup.

In the four U sub-haplogroups analyzed, U1a contained 44 Variants. Two Variants were found in regions coding for tRNA[D] and tRNA[L:CUN].

64 variants were observed for U4b, the most common sub-haplogroup, (n=20) found in the gene encoding 16S-RNR2 (**Supplementary Figure 6B**). Twenty-one Variants were found in coding regions (14 synonymous and 7 nonsynonymous substitutions), with the highest number seen in the gene coding for *COI* (n=6 Variants). Four tRNA mutations were observed in this sub-haplogroup and one mutation in the D-loop region.

A total of 52 variants were observed across all samples in the U7a subgroup (**Supplementary Figure 6B**). Twenty-seven Variants were found in noncoding regions, 12S-RNR1, 16S-RNR2, and the D-loop region. Twenty-five Variants were found in the coding region (17 synonymous and 8 nonsynonymous substitutions), with 17/25 distributed among the *ND* genes coding for *ND1-6*. *ND5* (n=6 Variants) encodes five synonymous mutations, with a nonsynonymous mutation observed at m.14110 T>C (F592L, in 4/6 subjects).

A total of 55 Variants was observed for U2e, with the majority (n=33 Variants) falling in the noncoding regions (HVRI-III and D-loop) and the 12S-RNR1, 16S-RNR2, and tRNA genes. Twenty-two Variants fell within the coding region (15 synonymous and 7 nonsynonymous substitutions), of which 8 fell in the *ND* gene complex (four *ND2*, four *ND5*) and four in the *CYTB* gene. While all the Variants in the *ND2* and *ND4* genes are synonymous substitutions, all the Variants in the *CYTB* gene encoded nonsynonymous mutations (m.14766 C>T; T7I in 3/3 subjects, m.15326 A>G; T194A in 3/3 subjects; m.14831 G>A; A29T and m.15479 C>T; F245L, both in 1/3 subjects).

Five subjects in our analysis (n=100) fell within the T haplogroup. We found four sub-haplogroups within this haplogroup (T1a, 2 subjects: T2b, T2i, and T2g, with 1 subject each). Our analysis indicated a total of 39 Variants (**Supplementary Figure 6C**) for T1a, with 21/39 Variants found in noncoding regions, including 12S-rRNA, 16S-rRNA, tRNAs, and control regions, including the D-loop. Eighteen Variants were observed in the coding region, with the greatest number occurring in the *CYTB* gene (n=5 Variants). Three Variants within the *CYTB* gene coded for nonsynonymous mutations, including m.14776 C>T, m.14905 G>A, and m.15452 C>A, coding for T7I, T194A, and L236I substitutions, respectively.

The T2b, T2g, and T2i sub-haplogroups contained 35, 42, and 34 Variants, respectively, in total. We found that *CYTB* contained the majority of the Variants found in the coding regions in these sub-haplogroups, except for the T2i group in which the *CYTB* Variants (n=5) constituted the majority of the Variants found in coding and noncoding regions of the genome. Two Variants, m.14766 C>T and m.15326 A>G, seen in all three groups code for nonsynonymous substitutions, and m.15452 C>A was seen in T2g and T2i and codes for a nonsynonymous mutation. Single mutations were seen for m.15497 G>A and m.14798 T>C and code for nonsynonymous substitutions and need further investigation.

The A haplogroup in our study consists of the sub-haplogroup A2v (n=3 subjects). The subjects in the A2v sub-haplogroup had a total of 17 Variants (**Supplementary Figure 6D**) distributed across the mitochondrial genome. Twelve of seventeen Variants were found in the noncoding regions (HVR I, II) and in the 12S rRNA and 16S rRNA genes. Five Variants were distributed in the coding region across *ND2* (m.4769 A>G and m.6095 A>G), *ATPase6* (m.8860 A>G), *ND4* (m.11881 C>T), and *CYTB* (m.15326 A>G). Two nonsynonymous substitutions were observed in the *ATPase6* and *CYTB* genes that need further investigation.

F1g (n=1 subject) is a sub-haplogroup, along with Z1a (n=1 subject). A total of 33 and 32 Variants, respectively, were identified in these groups. Nine *CYTB* Variants were observed in total for both groups. Two encoded nonsynonymous substitutions, m.14766 C>T (T7I) and m.15326 A>G (T194A), while the seven other Variants resulted in synonymous mutations. Variants for *ND4L* are seen only across Z1a and F1g, with the m.10609 T>C SNP in F1g resulting in a nonsynonymous shift (M47T), while the Z1a SNP resulted in a synonymous substitution (**Supplementary Figure 6D**).

The M haplogroup (n=52 subjects) consists of 12 sub-haplogroups, the most number for a haplogroup in our study (**Supplementary Figure 6E**). M30d is the sub-haplogroups with the highest number of subjects in the M haplogroup (n=11 subjects). Fifty-one Variants were identified in this sub-haplogroup in total, of which 28 Variants were seen in the noncoding regions (HVR I, II, III), the D-loop region, and the 12S-RNR1 and 16S-RNR2 genes. The remaining 23 Variants were part of the coding region within *CYTB* (n=8 Variants) and *ND4* (n=5 Variants) and formed a majority. Nine of thirteen Variants in *CYTB* and *ND4* code for synonymous substitutions, while four Variants in *CYTB* resulted in nonsynonymous substitutions (m.14766 C>T; T7I, m.15218 A>G; T158A, m.15326 G>A; T194A, and m.15420 G>A; A229T).

M39b (n=10 subjects) is one of the largest sub-haplogroups, and a total of 59 Variants were seen for this sub-haplogroup. The noncoding regions, 12S, 16S, and control regions, together constitute 33/59 of the Variants. Of the remaining 26 Variants, the 5 Variants in the *CYTB* complex constitute the greatest number, while the ND gene complex accounts for 12 Variants (2 *ND1*, 1 *ND2*, 2 *ND3*,

2 *ND4*, 3 *ND5*, and 2 *ND6*). Of the nine remaining Variants, six are seen in the *COI*, *II*, and *III* genes (two each), while three Variants are found in the *ATPase6* gene.

The M2 sub-haplogroup consists of M2a (n=2 subjects) and M2b (n=1 subject). A total of 110 Variants was observed in total for M2a and M2b (**Supplementary Figure 6E**). In M2a, 23/53 Variants occurred in noncoding regions (HVR I, II, III), the 12S-RNR1 and 16S-RNR2 genes, the control region (OL), and the D-loop region. Thirty Variants occurred in the coding regions, making this one of the sub-haplogroups in which Variants in the coding region outnumber the Variants in the noncoding region. *CYTB* harbors seven Variants, followed by three Variants in *ND4* and three Variants in *ATPase8*, *ATPase6*, and *COI*. A total of 55 Variants was observed for M2b, in which 31/55 Variants occurred in the noncoding regions. Twenty-four Variants were observed in genes coding for *COI*, *III*; *ND1,2,3,4,5*; *ATPase6,8*; and *CYTB*. The six Variants in *CYTB* constitute the greatest number of Variants in the coding region. The M2a/b sub-haplogroup is also conspicuous by the presence of Variants in the *ATPase8* gene, which is not observed in any sub-haplogroup besides U4b. The complete distribution of the Variants across all the sub-haplogroups is presented in **Table 2**.

The M3a sub-haplogroup (n=8 subjects) consists of 38 variants, with 12/38 variants in the HVR I, II, III, D-loop regions (**Supplementary Figure 6E**). 19/38 variants were observed in the protein coding regions, with the most variants in this region occurring in *CYTB* (n=5). We found 15 coding for synonymous substitutions and 5 for non-synonymous variants (Supplementary Figure 4E)

M52b sub haplogroup (n=9 subjects) contained a total of 90 variants. 29/90 variants were observed in HVR I, II, III and the D-loop (**Supplementary Figure 6E**). 31 variants were observed for protein coding genes. *CYTB* (n=9 variants) contains the most variants for this region. 2 variants were found in t-RNA coding genes. 22 variants coded for synonymous substitutions while 9 variants coded for non-synonymous substitutions.

M24a subhaplogroup (n=8 subjects) contains a total of 48 variants, 12/48 are seen in HVR I, II, III and D-loop (**Supplementary Figure 6E**). 22/48 are found in protein encoding genes with the most on *CYTB* (n=5 variants). 13 synonymous variants and 7 non-synonymous variants are seen in this sub-haplogroup. The rest of the variants are seen in 12S, 16S-rRNA. No variants for t-RNA genes were observed in this sub-haplogroup.

M27b (n=1 subject) has a total of 41 variants (**Supplementary Figure 6E**). 16/41 are seen in HVR I, II, III and the D-loop. 22/41 variants are seen in protein encoding genes with the highest variant count in *CYTB* (n=6 variants). 14 synonymous and 8 non-synonymous variants are observed for this sub-haplogroup and 1 variant for t-RNA coding gene.



M4a (n=1 subject) contains a total of 40 variants. 15/40 variants are seen in the non-coding regions of HVRI, II, III and D-loop (**Supplementary Figure 6E**). 21 variants are seen in the protein coding region with *CYTB* gene (n=5 variants) containing the highest variant count. Like M27b, M4a contains 14 synonymous and 7 non-synonymous variants and 1 variant on the t-RNA coding gene.

A total of 45 variants was seen in M5a sub-haplogroup (n=2 subjects) (**Supplementary Figure 6E**). 19/45 was seen in protein coding genes with *CYTB* (n=7 variants) representing the highest variants in the protein coding region. 13 variants code for synonymous substitutions while 6 code for non-synonymous variants. 1 variant is observed for a t-RNA coding gene.

M35b sub-haplogroup (1 subject) contains a total of 40 variants (**Supplementary Figure 6E**). 15/40 variants are seen in HVR I, II, III and D-loop and 20/40 variants are found in protein encoding regions with the most variants observed in *CYTB* gene (n=5 variants). 14 code for synonymous substitution while 7 code for non-synonymous substitutions. 1 variant is observed for a t-RNA coding gene.

M33a sub-haplogroup (n=1 subject) contains 39 variants (**Supplementary Figure 6E**). 15/39 variants are observed in HVR I, II, III and D-loop, 19/39 variants are seen in the protein coding region, with the highest count seen for *CYTB* (n=5 variants) for this region. 12 are synonymous and 7 are non-synonymous substitutions. 1 variant for t-RNA coding gene is also observed in this sub-haplogroup. This haplogroup is unique amongst the 25 sub-haplogroups owing to the presence of a variant (m.8562 C>T) at *ATPase6/8* gene.

## Haplogroup HV

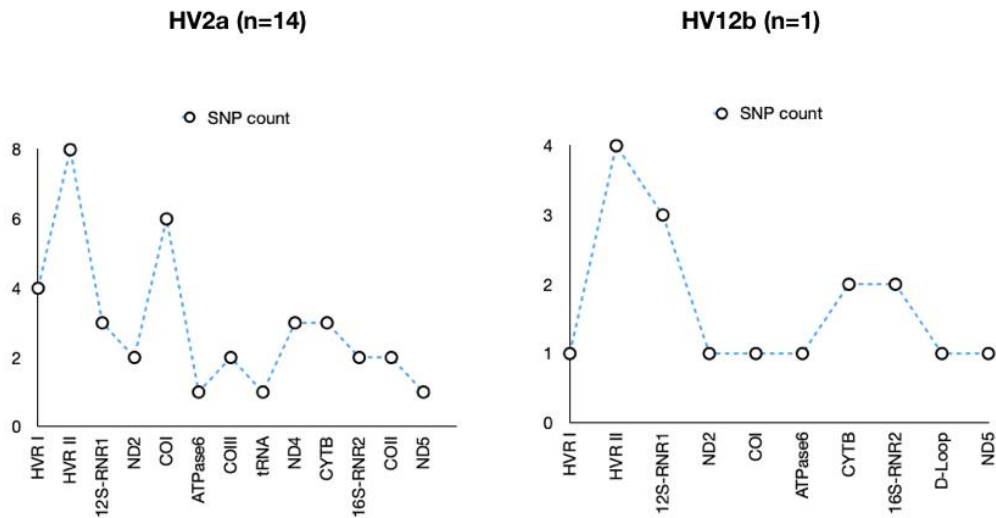

**Supplementary Figure 6A:** Distribution of Variants across gene loci in the HV haplogroup consisting of HV2a (n=14 subjects and HV12b (n=1 subject)

## Haplogroup U

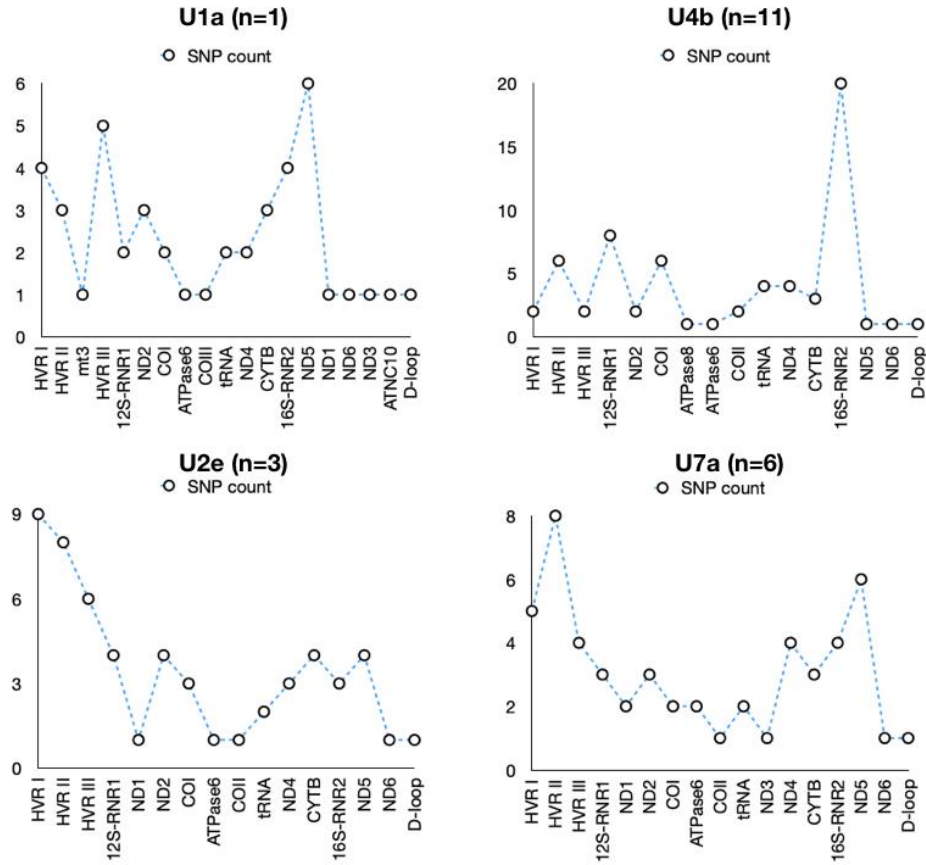

**Supplementary Figure 6B:** Distribution of Variants across gene loci in the U haplogroup consisting of U1a, U4b, U2e and U7a

## Haplogroup T

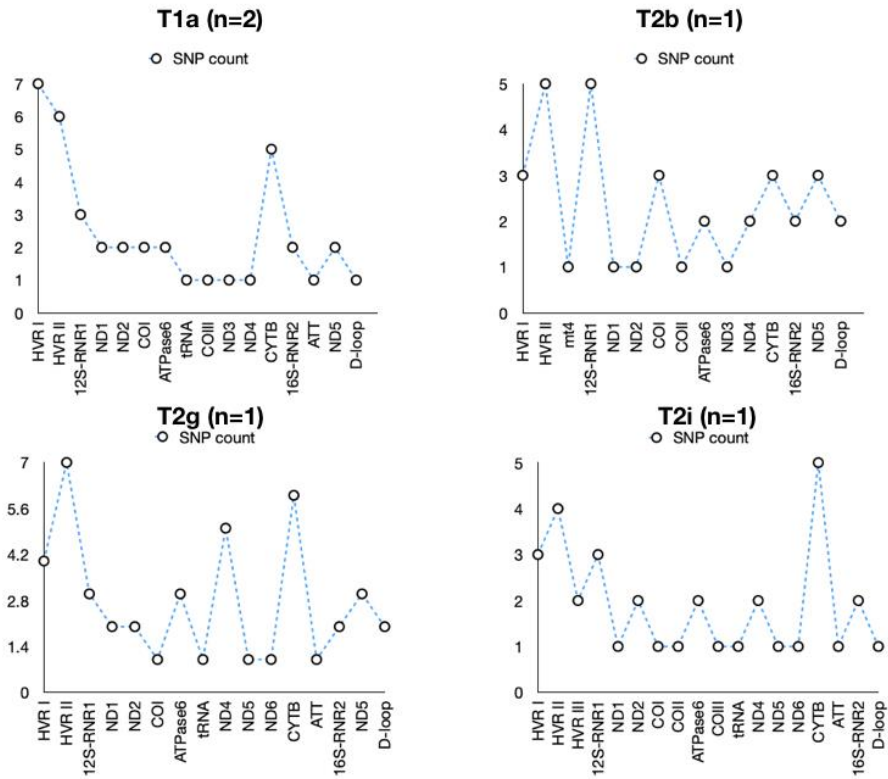

**Supplementary Figure 6C:** Distribution of Variants across gene loci in the T haplogroup consisting of T1a, T2b, T2g and T2i

## Haplogroup A, Z, F

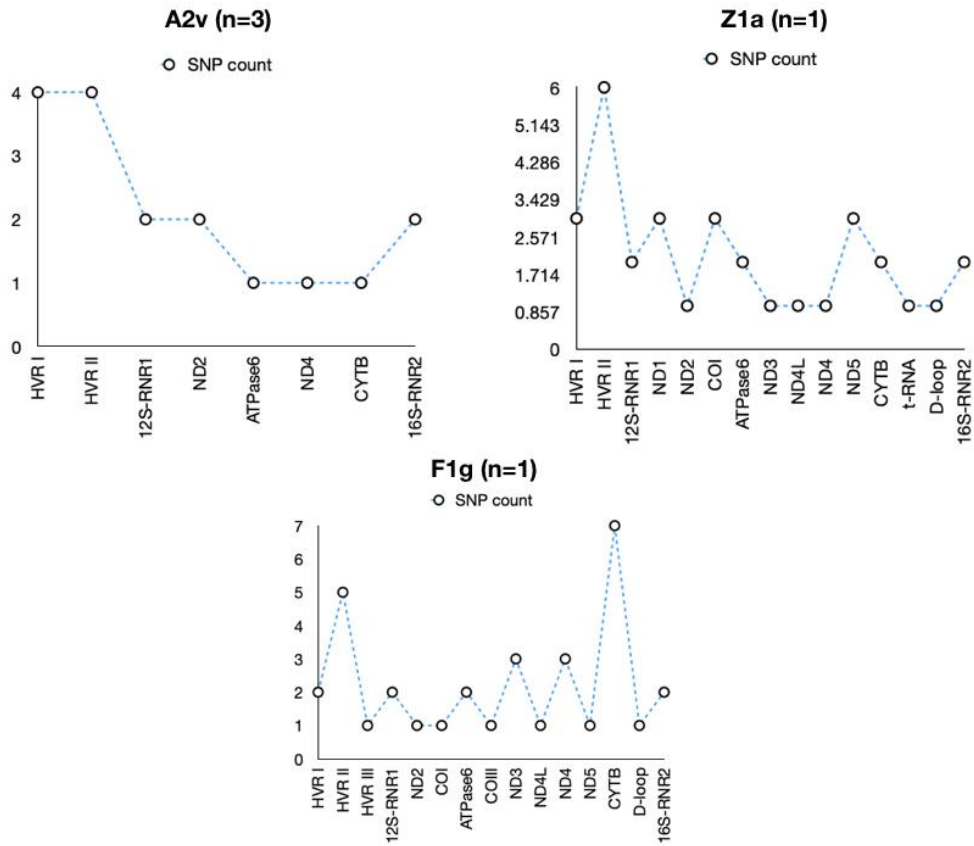

**Supplementary Figure 6D:** Distribution of Variants across gene loci in the A, Z and F haplogroup consisting of A2v, Z1a and F1g

## Haplogroup M

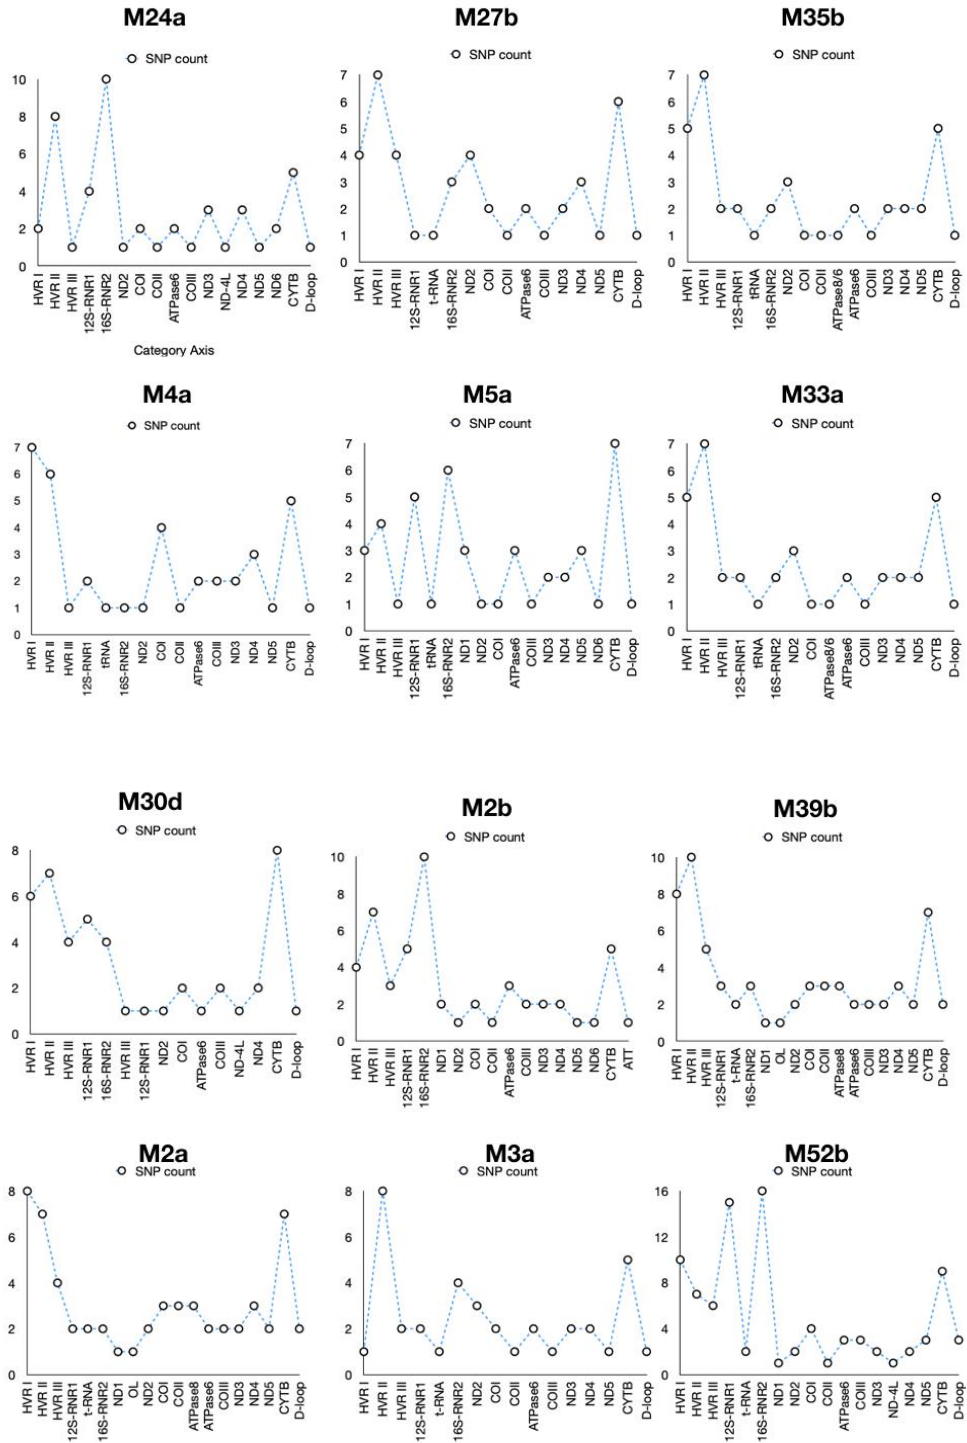

**Supplementary Figure 6E: Distribution of variants across gene loci across the M sub-haplogroups**

**Supplementary Figure 7: VarDiG<sup>®</sup>-R analysis of 420 variants indicates high association of Parsi specific variants with Parkinsons diseases**

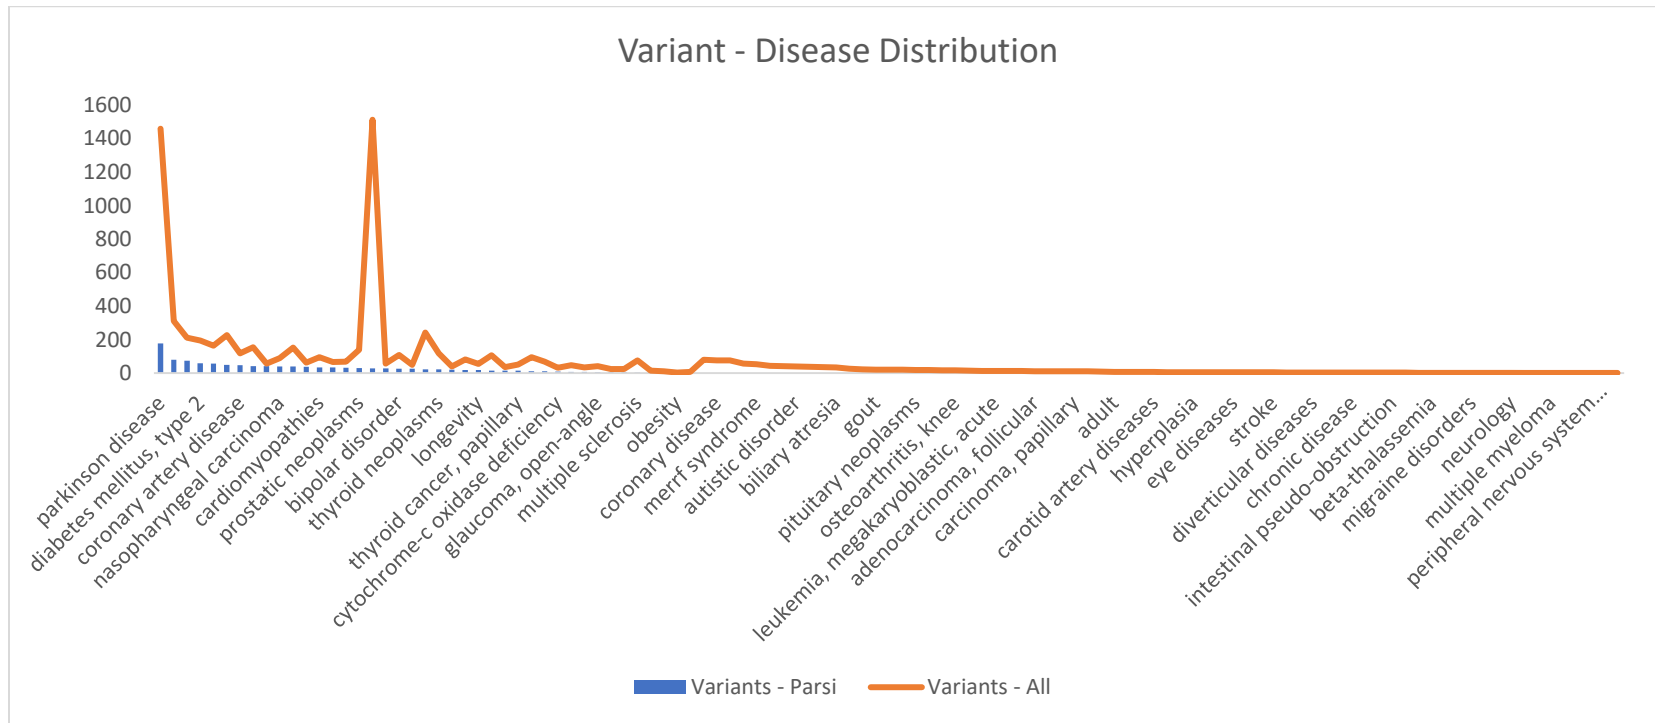

**Supplementary Figure 7: Variant-disease distribution of 420 Parsi variants.** Graph depicts the variant-disease distribution between Parsis (blue) and VarDiG<sup>®</sup>-R (Brown)



**Supplementary Figure 8: Observation of Longevity variants across all sub-haplogroups and predisposition of U and M haplogroups to diseases**

A

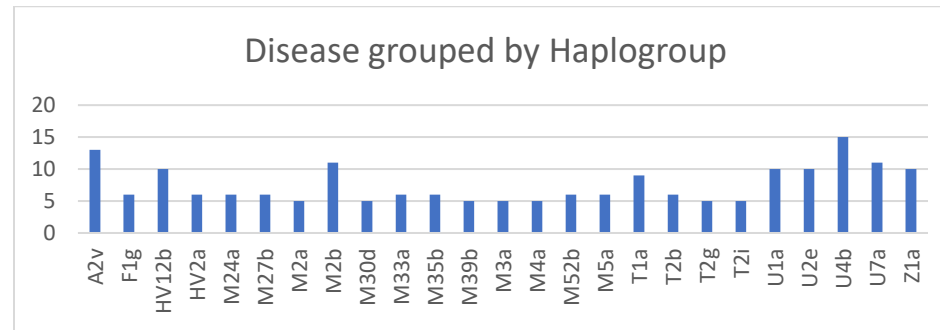

B

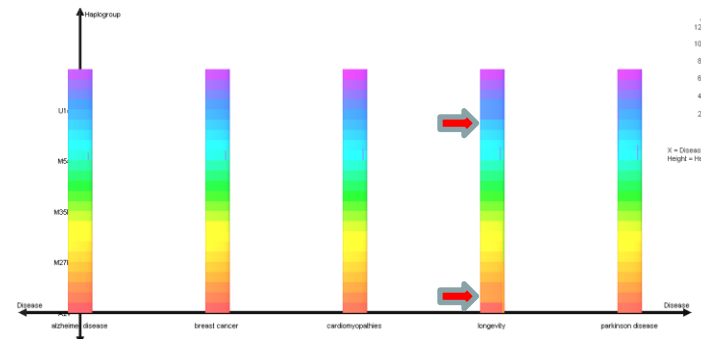

**Supplementary Figure 8: Haplogroup specific distribution of diseases.** (A) Distribution of 188 diseases across 25 sub-haplogroups of the 100 Parsi subjects analyzed in this study (B) Histogram depicting longevity and disease prevalence across U1a, M52b, M35b, M27b

## Supplementary Figure 9: Non-synonymous variants among 420 variants and their disease associations

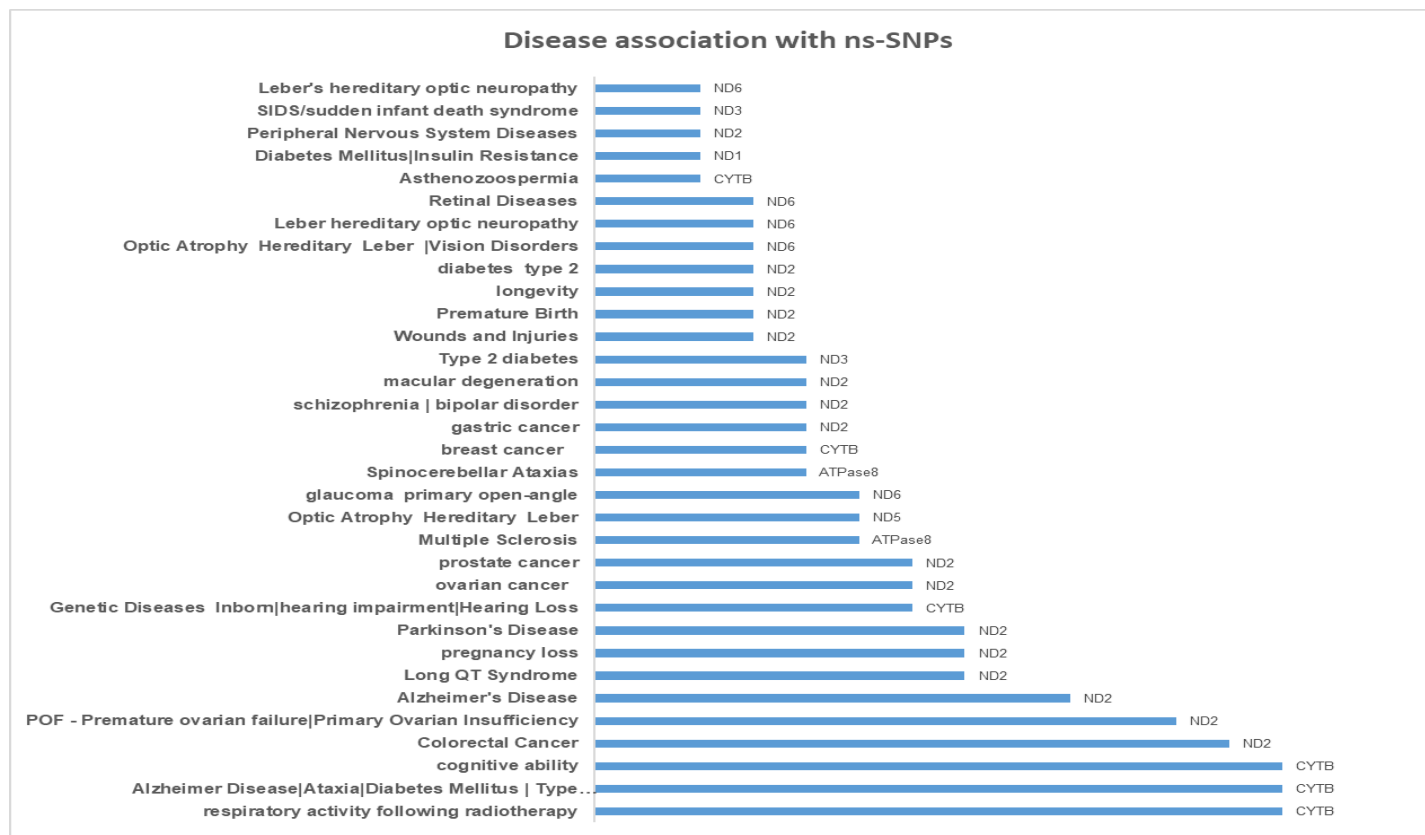

**Supplementary Figure 9:** Analysis of the non-synonymous variants within 420 variants in the 100 Parsi mitochondrial genome sequences for and their disease associations.

**Supplementary Figure 10: Non-synonymous variants among 420 variants and their associations with mitochondrial function**

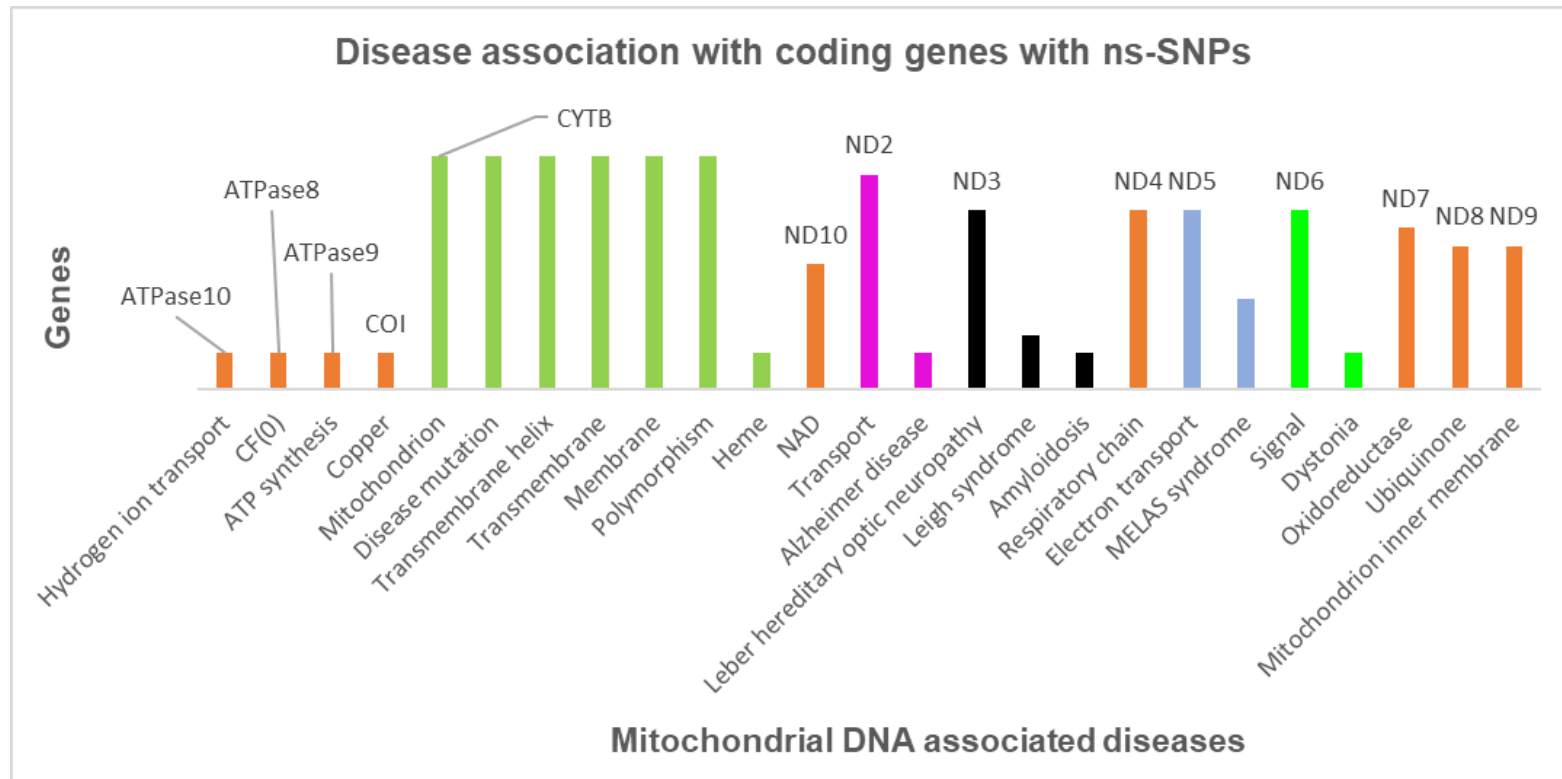

**Supplementary Figure 10 : Distribution of non-synonymous Variants across coding genes.** Analysis was performed on the 420 Variants linked to the 100 Parsi mitochondrial genomes.

**Supplementary Table 1: Description of primers used in validation of AGENOME-ZPMS-HV2a-1 by Sanger sequencing**

| Primer name      | Primer type | Primer sequence        | Amplicon size | Region of Interest              |
|------------------|-------------|------------------------|---------------|---------------------------------|
| Hs_Mito_DL_15975 | Forward     | CTCCACCATTAGCACCCAAAGC | 1198          | D-loop HVR                      |
| Hs_Mito_DL_583   | Reverse     | GCTTTGAGGAGGTAAGCTAC   |               |                                 |
| Hs_Mito_3636     | Forward     | CCTAGCCGTTTACTCAATCC   | 3481          | Other regions of mito<br>genome |
| Hs_Mito_6997     | Reverse     | GGGTGTAGCCTGAGAATAG    |               |                                 |

**Supplementary Table 1:** Table shows the list of primers sequences used for Sanger sequencing for validation of selected variants in the AGENOME-ZPMS-HV2a-1

**Supplementary Table 2: Distribution of 420 variants for each sub-haplogroup for protein coding regions, D-loop of 100 Parsi mitogenomes**

**Association of coding region, D-loop with sub-haplogroup**

| Sub-haplogroup | Coding gene SNPs | Gene with max SNPs   | D-loop |
|----------------|------------------|----------------------|--------|
| HV2a           | 20               | 6 COI                | 1      |
| HV12b          | 6                | 2 CYTB               | 0      |
| U4b            | 21               | 6 COI                | 4      |
| U2e            | 22               | 4 CYTB, 4 ND2, 4 ND5 | 2      |
| U7a            | 25               | 6 ND5                | 2      |
| U1a            | 21               | 6 ND5                | 2      |
| T1a            | 18               | 5 CYTB               | 1      |
| T2b            | 17               | 3 CYTB               | 0      |
| T2g            | 24               | 6 CYTB               | 1      |
| T2i            | 17               | 5 CYTB               | 1      |
| A2v            | 5                | 2 ND2                | 0      |
| F1g            | 20               | 7 CYTB               | 0      |
| Z1a            | 17               | 3 ND5                | 1      |
| M30d           | 24               | 8 CYTB               | 1      |
| M33a           | 19               | 5 CYTB               | 1      |
| M35b           | 21               | 5 CYTB               | 1      |
| M39b           | 22               | 5 CYTB               | 0      |
| M3a            | 19               | 5 CYTB               | 1      |
| M4a            | 20               | 5 CYTB               | 1      |
| M52b           | 31               | 9 CYTB               | 2      |
| M5a            | 21               | 6 CYTB               | 1      |
| M2a            | 29               | 7 CYTB               | 2      |
| M2b            | 25               | 6 CYTB               | 2      |
| M27b           | 22               | 6 CYTB               | 1      |
| M24a           | 20               | 5 CYTB               | 1      |

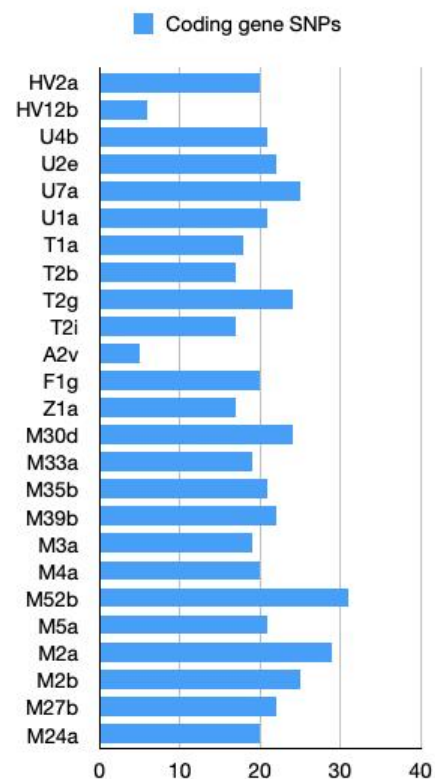

**Supplementary Table 2: Distribution of Variants across coding genes, D-loop across all the 25 sub-haplogroup**

### Supplementary Table 3: Phylogenetic clustering of complete mitogenomes of Parsis with 352 Iranian and 100 relic tribes of Indian origin

**Table: Clustering of Parsis with population of Persian and Indian descent**

| Major haplogroup | Sub-haplogroups | People of Persian origin (PO) | People of Indian & Relic tribal origin (IO) | Max BS value to nearest PO | Max BS value to nearest IO |
|------------------|-----------------|-------------------------------|---------------------------------------------|----------------------------|----------------------------|
| HV               | HV2a            | Persian                       | N.A                                         | 0.7270                     | 0                          |
|                  | HV12b           | Persian, Qashqai, Mazandarani | N.A                                         | 0.6550                     | 0                          |
| U                | U7a             | Persian, Kurd, Tajik          | N.A                                         | 0.8980                     | 0                          |
|                  | U2e             | Persian, Qashqai, Azeri       | N.A                                         | 1.000                      | 0                          |
|                  | U4b             | Persian, Khorasani, Qashqai   | N.A                                         | 0.5100                     | 0                          |
|                  | U1a             | Persian, Armenian             | N.A                                         | 0.6850                     | 0                          |
| T                | T1a             | Persian                       | N.A                                         | 0.7320                     | 0                          |
|                  | T2g             | Persian                       | N.A                                         | 0.4880                     | 0                          |
|                  | T2i             | Persian                       | N.A                                         | 0.4480                     | 0                          |
|                  | T2b             | Persian                       | N.A                                         | 0.4320                     | 0                          |
| M                | M5a             | Persian                       | Munda, Mahali                               | 0.9860                     | 0.6270                     |
|                  | M39b            | Unique cluster                |                                             |                            |                            |
|                  | M33a            | Azeri                         | Jenu Kuruba                                 | 0.2250                     | 0.0960                     |
|                  | M52b            | Indian Shia Muslim            | Mathakur, Dirang Monpa                      | 0.7950                     | 0.1170                     |
|                  | M24a            | Persian, Qashqai              | Pauri Bhaiya, Nihal                         | 0.8560                     | 0.0200                     |
|                  | M3a             | Persian                       | N.A                                         | 0.9380                     | 0                          |
|                  | M30d            | Unique cluster                | 1 M30d with Brahmin lyengar, Bhovi          | 0                          | 0.4020                     |
|                  | M2a             | N.A                           | Lambadi, Hill Kolam, Katkari, Dongri Bhil   | 0                          | 0.6110                     |
|                  | M4a             | Persian                       | N.A                                         | 0.8560                     | 0                          |
|                  | M2b             | N.R                           | Korku, Hill Kolam                           | 0                          | 0.9400                     |
|                  | M35b            | Persian                       | N.A                                         | 0.3860                     | 0                          |
|                  | M27b            | Indian Shia Muslim            | N.A                                         | 0.4220                     | 0                          |
| A                | A2v             | Persian                       | N.A                                         | 0.4690                     | 0                          |
| F                | F1g             | Kurd, Turkmen                 | N.A                                         | 0.9970                     | 0                          |
| Z                | Z1a             | Qashqai, Persian              | N.A                                         | 0.2470                     | 0                          |

**Supplementary Table 3** : Results of the Phylogenetic clustering of the 100 Parsis mitochondrial genomes with 352 mitochondrial genomes of Iranian origin and 100 mitochondrial genomes of relic tribes of Indian origin through Neighbour Joining method. BS indicates Boot-Strap values between each sample. \*N.A. indicates *No Association*, indicating a lack of representation of samples in the specific sub-haplogroup

**Supplementary Table 4: Variants associated with haplogroup specific Zoroastrian Parsi Mitochondrial Reference Genome (n=7) and Zoroastrian Parsi Mitochondrial Consensus Genome (n=1) mitochondrial genome sequences**

| Consensus Sequence     | Number of Variants | Variants                                                                                                                                                                                                                                                                          |
|------------------------|--------------------|-----------------------------------------------------------------------------------------------------------------------------------------------------------------------------------------------------------------------------------------------------------------------------------|
| AGENOME-ZPMCg-V1.0     | 31                 | T65TT, A73G, A263G, C309CCCT, T310C, T489C, G513GCA, A567ACCCCC, A750G, A1438G, A2706G, A3158AT, A4769G, C7028T, A8701G, A8860G, T9540C, A10398G, C10400T, T10873C, G11719A, C12705T, C14766T, T14783C, G15043A, G15301A, A15326G, C16169CC, A16182AC, C16223T, T16519C           |
| AGENOME-ZPMRG-A2v-V1.0 | 11                 | A263G, C309CCCT, T310C, A750G, A1438G, A4769G, A8860G, C11881T, A15326G, C16168T, C16239T                                                                                                                                                                                         |
| AGENOME-ZPMRG-HV-V1.0  | 26                 | T72C, A73G, T152C, T195C, A263G, C309CCCT, T310C, A750G, A1438G, A2706G, A4769G, T5075C, C6104T, G6179A, C7028T, T7193C, A8860G, A9336G, T10410C, G11016A, T11935C, C12061T, A15326G, T15792C, T16217C, A16309G                                                                   |
| AGENOME-ZPMRG-M-V1.0   | 29                 | T65TT, A73G, A263G, C309CCCT, T310C, T489C, A567ACCCC, A750G, A1438G, A2706G, A4769G, C7028T, A8701G, A8860G, T9540C, A10398G, C10400T, T10873C, G11719A, C12705T, C14766T, T14783C, G15043A, G15301A, A15326G, C16169CC, A16182AC, C16223T, T16519C                              |
| AGENOME-ZPMRG-U-V1.0   | 25                 | A73G, A263G, C309CCCT, T310C, G499A, G513GCA, A567ACCCCC, A750G, A1438G, A1811G, A2706G, A3158AT, A4769G, C7028T, A8860G, C11332T, A11467G, G11719A, A12308G, G12372A, C14620T, C14766T, A15326G, T16189TT, T16519C                                                               |
| AGENOME-ZPMRG-T-V1.0   | 28                 | A73G, A263G, C309CCCT, T310C, G709A, A750G, A1438G, G1888A, A2706G, T4216C, A4769G, A4917G, C7028T, G8697A, A8860G, T10463C, A11251G, G11719A, G13368A, C14766T, G14905A, A15326G, C15452A, A15607G, G15928A, T16126C, C16294T, T16519C                                           |
| AGENOME-ZPMRG-F1g-V1.0 | 32                 | A73G, A248d, A263G, C315CC, CA514d, A750G, A1438G, C2389T, A2706G, T3398C, C3970T, T3999C, A4769G, T6392C, G6962A, C7028T, A8589G, A8860G, G10310A, T10609C, G11719A, G12406A, C12882T, G13928C, C14766T, A15326G, T15916C, A16183C, T16189C, C16193CC, T16304C, T16519C          |
| AGENOME-ZPMRG-Z-V1.0   | 33                 | A73G, C151T, T152C, A263G, C315CC, T489C, A750G, A1438G, A2072d, A2706G, A4769G, C7028T, A8701G, A8860G, T9540C, A10149T, A10398G, C10400T, C10556T, T10873C, G11719A, G12007A, C12705T, C14766T, T14783C, G15043A, G15301A, A15326G, G15346A, T15784C, C16223T, T16311C, T16519C |

**Supplementary Table 4:** List of unique variants associated with the Haplogroup specific Zoroastrian Parsi Mitochondrial Reference Genomes (ZPMRG) for A2v, HV, M, U, T, F1g, Z and overall unique variants in the Zoroastrian Parsi Mitochondrial Consensus Genome (ZPMCg)



**Supplementary Table 5: Variants associated with Zoroastrian Parsi Mitochondrial Reference Genome (ZPMRG) and unique variants of each ZPMRG compared to Zoroastrian Parsi Mitochondrial Consensus Genome (ZPMCG)**

| AGENOME-ZPMRG-A2v-V1.0 | AGENOME-ZPMRG-HV-V1.0 | AGENOME-ZPMRG-M-V1.0 | AGENOME-ZPMRG-T-V1.0 | AGENOME-ZPMRG-U-V1.0 | AGENOME-ZPMRG-F-V1.0 | AGENOME-ZPMRG-Z-V1.0 |
|------------------------|-----------------------|----------------------|----------------------|----------------------|----------------------|----------------------|
| C11881T                | A16G                  |                      | C6G                  | A21G                 | A248d                | C151T                |
| C16168T                | T72C                  |                      | G709A                | G499A                | CA514d               | A2072d               |
| C16239T                | T195C                 |                      | G1888A               | A1811G               | C2389T               | C10556T              |
|                        | T5075C                |                      | T4216C               | C11332T              | T3398C               | G12007A              |
|                        | C6104T                |                      | A4917G               | A11467G              | C3970T               | G15346A              |
|                        | G6179A                |                      | G8697A               | A12308G              | T3999C               | T15784C              |
|                        | T7193C                |                      | T10463C              | G12372A              | T6392C               | T16311C              |
|                        | A9336G                |                      | A11251G              | C14620T              | G6962A               |                      |
|                        | T10410C               |                      | G13368A              |                      | A8589G               |                      |
|                        | G11016A               |                      | G14905A              |                      | G10310A              |                      |
|                        | T11935C               |                      | C15452A              |                      | T10609C              |                      |
|                        | C12061T               |                      | A15607G              |                      | G12406A              |                      |
|                        | T15792C               |                      | G15928A              |                      | C12882T              |                      |
|                        | T16217C               |                      | T16126C              |                      | G13928C              |                      |
|                        | A16309G               |                      | C16294T              |                      | T15916C              |                      |
|                        |                       |                      |                      |                      | A16183C              |                      |
|                        |                       |                      |                      |                      | C16193CC             |                      |
|                        |                       |                      |                      |                      | T16304C              |                      |

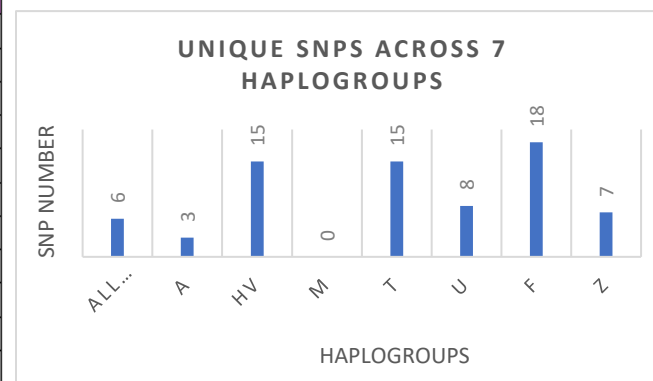

**Supplementary Table 5:** (A) Unique Variants found in the haplogroup specific Reference Genomes (ZPMRG) compared to the Zoroastrian-Parsi Consensus Genome (AGENOME-ZPMCG-V1). The histogram (right) lists the exact number of variants in each ZPMRG compared to ZPMCG

**Supplementary Table 6: mt-t-RNA variants in our study and their disease association**

| mt-tRNA  | Variation | Probability_of_pathogenicity | Classification    | Frequency % | Haplogroup  | Disease association                                                             |
|----------|-----------|------------------------------|-------------------|-------------|-------------|---------------------------------------------------------------------------------|
| Phe      | T593C     | 0.16                         | Neutral           | 0.06        | M52b        | Non-syndromic hearing loss (Reported)                                           |
| Val      | G1644A    | 0.67                         | Pathogenic        | 0.01        | U4b         | LS/HCM/MELAS (Reported)                                                         |
| Val      | T1654C    | 0.12                         | Neutral           | 0.01        | M3a         |                                                                                 |
| Met      | T4454C    | 0.13                         | Neutral           | 0.02        | M5a         | Possible contributor to mito dysfunction / Hypertension (Reported)              |
| Asp      | G7521A    | 0.46                         | Likely neutral    | 0.01        | U4b         |                                                                                 |
| Asp      | T7561C    | 0.33                         | Neutral           | 0.01        | U7a         |                                                                                 |
| Asp      | T7581C    | 0.42                         | Likely neutral    | 0.01        | U1a         |                                                                                 |
| Arg      | T10410C   | 0.17                         | Neutral           | 0.14        | Hv2a        |                                                                                 |
| Arg      | T10463C   | 0.31                         | Neutral           | 0.04        | T1a,T2g,T2i |                                                                                 |
| His      | A12172G   | 0.53                         | Likely pathogenic | 0.01        | U4b         |                                                                                 |
| His      | C12191G   | 0.11                         | Neutral           | 0.01        | M27b        |                                                                                 |
| Leu(CUN) | A12279G   | 0.37                         | Likely neutral    | 0.06        | M52b        |                                                                                 |
| Leu(CUN) | A12308G   | 0.41                         | Likely neutral    | 0.21        | U4b,U7a     | Stroke, CM, CPEO, Breast/Renal/Prostate cancer risk, Altered brain pH(Reported) |
| Glu      | A14696G   | 0.26                         | Neutral           | 0.01        | A2v         | Progressive Encephalopathy (Reported)                                           |
| Thr      | A15907G   | 0.23                         | Neutral           | 0.03        | U2e         |                                                                                 |
| Thr      | T15908C   | 0.5                          | Likely pathogenic | 0.01        | M33a        | Deaf Helper mutation (Reported)                                                 |
| Thr      | T15916C   | 0.33                         | Likely neutral    | 0.01        | F1g         |                                                                                 |

**Supplementary Table 6:** Analysis of the occurrence of the 420 variants in the tRNA and their disease associations annotated with the PON-mt-tRNA database. A frequency score  $\geq 0.5$  – pathogenic,  $=0.5$  – likely pathogenic,  $<0.5$  – neutra
